# Supplementary material for: An integrated approach based on phytochemistry, network pharmacology and metabolomics reveals the mechanism of action ofXanthium strumariumL. for allergic rhinitis
Source: Royal Society of Chemistry journal article supplement (doi:10.1039/d0ra06763f), 2020-01-01
Supplement: d0ra06763f1.pdf [file d0ra06763f1.pdf]

**Supplementary Materials**

**An integrated approach based on phytochemistry, network pharmacology and metabolomics reveals the mechanism of action of *Xanthium strumarium* L. for allergic rhinitis**

Tie Yao,<sup>ab1</sup> Jiankun Yan,<sup>bd1</sup> Yang Li,<sup>b</sup> Jiaxin Wang,<sup>b</sup> Miao Qiao,<sup>b</sup> Xintong Hu,<sup>b</sup> Xuliu Shi,<sup>bd</sup> Shijie Cao\*<sup>c</sup> and Feng Qiu\*<sup>ab</sup>

<sup>a</sup> School of Traditional Chinese Materia Medica, Shenyang Pharmaceutical University, Shenyang 110016, China;

<sup>b</sup> School of Chinese Materia Medica and Tianjin State Key Laboratory of Modern Chinese Medicine, Tianjin University of Traditional Chinese Medicine, Tianjin 301617, China;

<sup>c</sup> Tianjin State Key Laboratory of Modern Chinese Medicine, Tianjin University of Traditional Chinese Medicine, Tianjin 301617, China;

<sup>d</sup> Analysis Center of College of Science & Technology, Hebei Agricultural University, Cangzhou 061100, China;

Correspondence: fengqiu20070118@163.com (Feng Qiu); caoshijie@tjutcm.edu.cn (Shijie Cao)

Tel: +86-22-59596223 (Feng Qiu)

Address: 10 Poyanghu Road, west Area, Tuanbo New Town, Jinghai District, Tianjin 301617, P. R. China

<sup>1</sup> These authors contributed equally to this work.

**General experimental procedures.** Optical rotation were recorded on a Rudolph (Hackettstown, NJ) Autopol V automatic polarimeter. The NMR spectra were carried out on a Bruker (Billerica, MA) AM-600 spectrometer at 25°C referencing to the residuals of CD<sub>3</sub>OD. Analytical HPLC were performed on a Waters e2695 system equipped with a 2998 PDA detector using a YMC Pack ODS-A (5μm, 4.6 × 250 mm, YMC). Preparative HPLC (LC-6AD) was performed on YMC Pack ODS-A (5μm, 10 × 250 mm, YMC) with SPD-20A. All reagents were HPLC or analytical grade and were purchased from Tianjin Damao Chemical Company. Column chromatography (CC) was done with Silica gel (100-200 mesh and 200-300 mesh, Qingdao Haiyang Chemical Co., LTD), Sephadex LH-20 (Pharmacia, Sweden), ODS-A-HG (50μm) (YMC Group, Japan), and Macroporous resin D101 (Chemical Plant of Nankai University, Tianjin, China).

**Extraction and separation.** The dried fruits of *Xanthium strumarium* L. (29 kg) were extracted with 75% aqueous EtOH (3 × 300 L, each 2 h) using reflux, and mixture was concentrated under reduced pressure to obtain the crude extract (2.8 kg). The extract was suspended in water and extracted with petroleum ether (PE, 60-90 °C) and EtOAc, as shown in Chart 1. Subsequently, the chromatographic separation techniques were applied to isolate the above three layers.

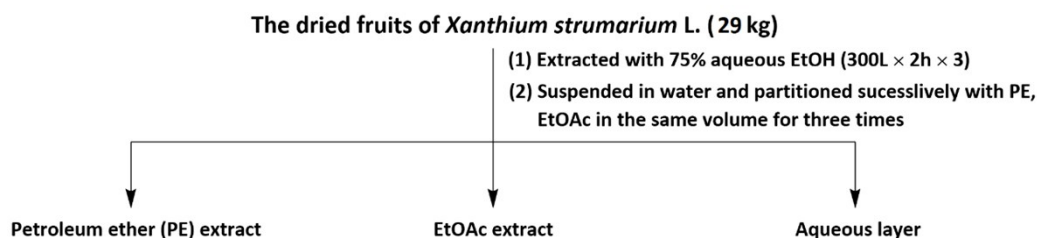

**Identification.** Finally, 119 compounds were isolated from *Xanthium strumarium*. The structures of these compounds were identified by spectroscopic methods and comparison with the reported data in reported data. All compounds were showed in Figure S1. Among them, Triterpenes and steroids **1–6**, others **3, 4, 9** and alkaloids **9** were isolated from PE extract, Anthraquinones **2, 5, 13, 19**, phenolic acids **16**, others **1, 2, 5, 7**, alkaloids **1**, and phenylpropanoids **24–27, 34, 42** were isolated from aqueous layer, while the remaining compounds were obtained from EtOAc extract.

**Table of Contents**

**Figure S1.** The structures of isolated compounds.

**Figure S2.** Three-dimension structures of ALOX5 and PTGS2.

**Figure S3.** OPLS-DA and S-plot of OPLS-DA of middle-dose XS treatment groups compared with the model group.

**Figure S4.** Base Peak Intensity (BPI) of Model and Middle-dose XS.

**Table S1.** The chemical name of structures.

**Table S2.** The score of molecular docking for compounds and 2D interaction diagrams.

**Table S3.** The data of Elisa experiment.

**Table S4.** The targets of potential active ingredients from Swiss Target Prediction database.

**Table S5.** The targets of potential active ingredients from HIT database.

**Table S6.** The genes from Drugbank, TTD, IPA databases.

**Table S7.** Up-regulated genes.

**Table S8.** Down-regulated genes.

**Table S9.** Top 10 KEGG pathway.

**Table S10.** Top 10 molecular function.

**Table S11.** Top 10 cellular component.

**Table S12.** Top 10 molecular function.

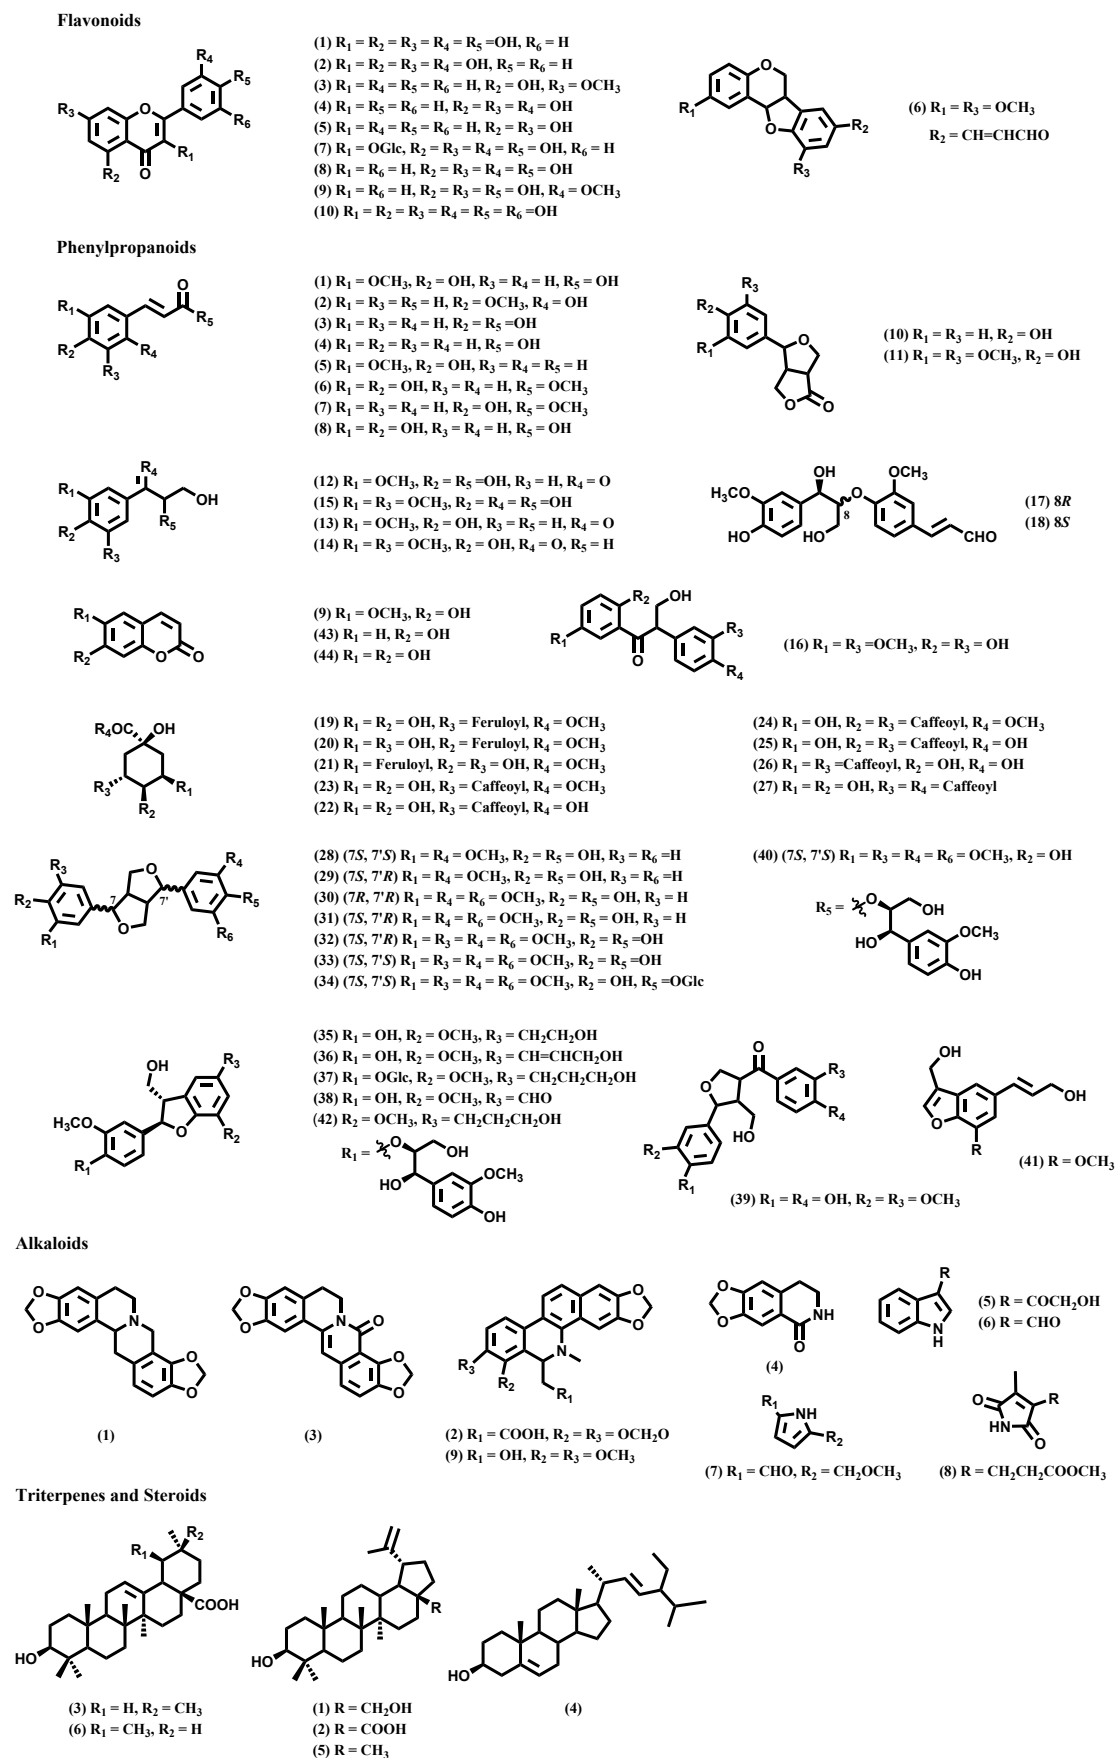

Figure S1. The structures of isolated compounds.



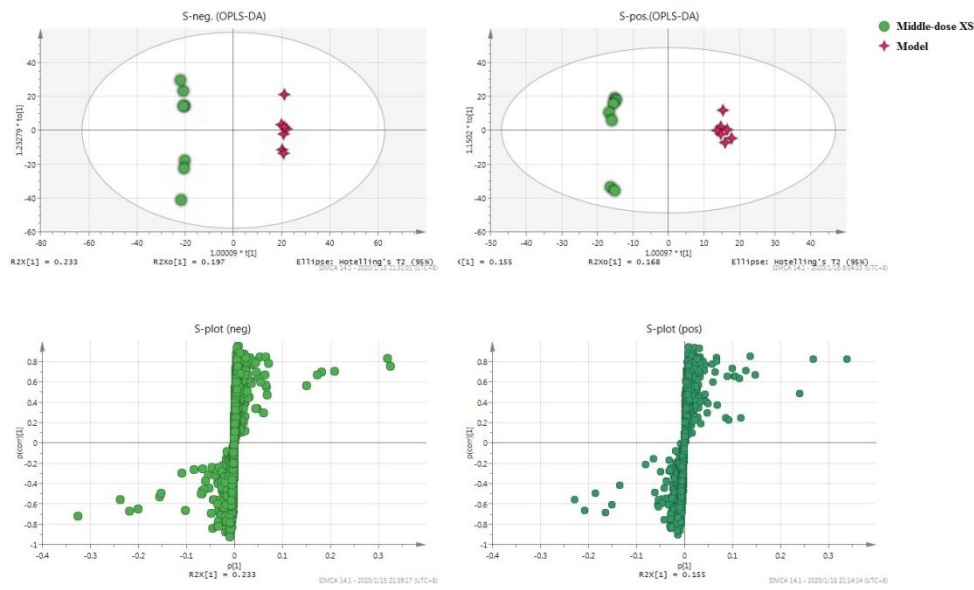

**Figure S3.** OPLS-DA and S-plot of OPLS-DA of middle-dose XS treatment groups compared with the model group.

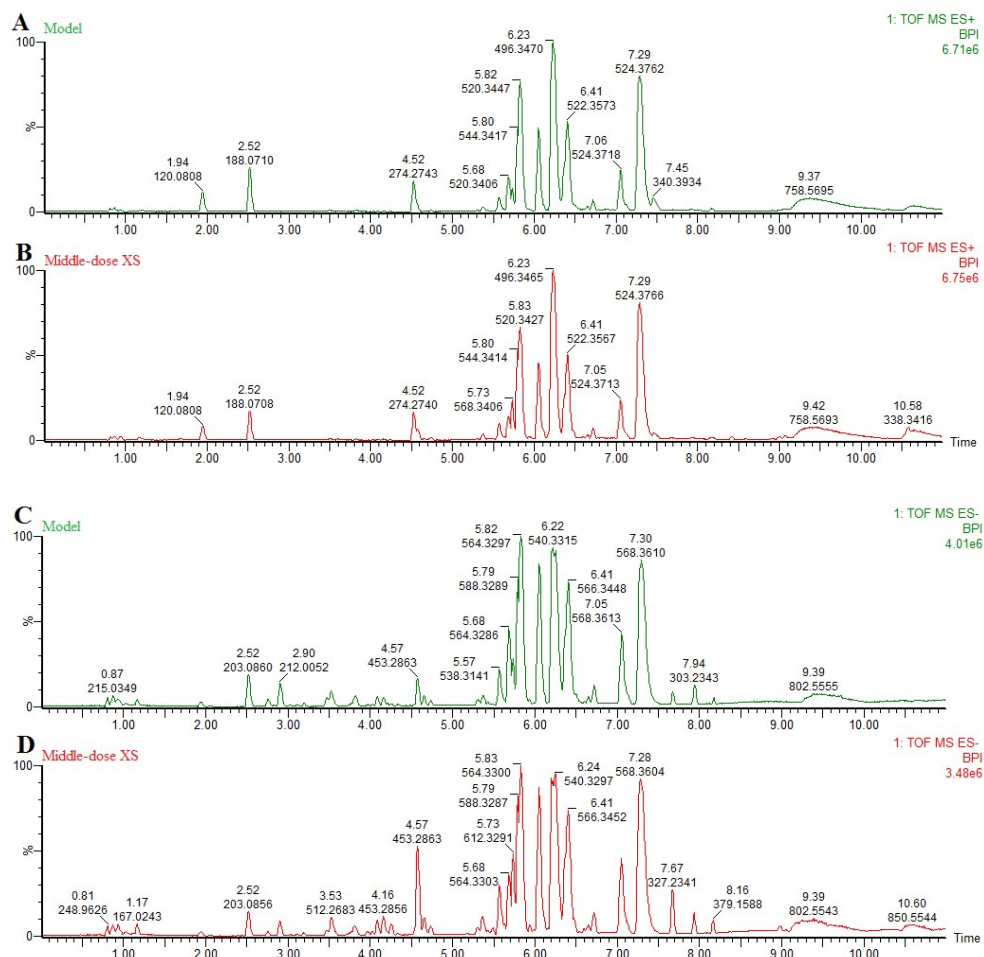

**Figure S4.** Base Peak Intensity (BPI) of Model and Middle-dose XS samples were measured in both positive and negative ion modes, respectively, (A): Model, ES+ ; (B): Middle-dose XS, ES+; (C) : Model, ES- ; (D) : Middle-dose XS, ES- .

**Table S1.** The chemical name of structures.

| <b>Antraquinones</b>    |                                                                                                                     |            |                                                                                                                               |
|-------------------------|---------------------------------------------------------------------------------------------------------------------|------------|-------------------------------------------------------------------------------------------------------------------------------|
| <b>No.</b>              | <b>Chemical Name</b>                                                                                                | <b>No.</b> | <b>Chemical Name</b>                                                                                                          |
| 1                       | Chrysophanol                                                                                                        | 2          | 2-Hydroxy-1,7,8-trimethoxy-3-methyl-9,10-anthracenedione                                                                      |
| 3                       | Aurantioobtusin                                                                                                     | 4          | 1,3-Dihydroxy-2,7,8-trimethoxy-6-methyl-9,10-anthracenedione                                                                  |
| 5                       | Glucobtusifolin                                                                                                     | 6          | Glucobtusin                                                                                                                   |
| 7                       | Chrysoobtusin 2-glucoside                                                                                           | 8          | 2-O- $\beta$ -D-Glucopyranosyloxy-1,7,8-trimethoxy-3-methylanthraquinone                                                      |
| 9                       | Obtusifolin                                                                                                         | 10         | Chrysoobtusin                                                                                                                 |
| 11                      | Obtusin                                                                                                             | 12         | Parietin                                                                                                                      |
| 13                      | 2-methoxy-chrysophano-8-O- $\beta$ -D-glucopyranoside                                                               | 14         | 2-hydroxyemodin-1-methylether                                                                                                 |
| 15                      | 8-Methoxylchrysophanol                                                                                              | 17         | Archin                                                                                                                        |
| 18                      | Aloe emodin                                                                                                         | 19         | Glucourantio-obtusin                                                                                                          |
| 20                      | Rhein                                                                                                               |            |                                                                                                                               |
| <b>Phenolic acids</b>   |                                                                                                                     |            |                                                                                                                               |
| 1                       | Galic acid                                                                                                          | 2          | Gallincin                                                                                                                     |
| 3                       | Cedar acid                                                                                                          | 4          | Syringaldehyde                                                                                                                |
| 5                       | Vanillic acid                                                                                                       | 6          | Methyl protocatechuate                                                                                                        |
| 7                       | Protocatechoic acid                                                                                                 | 8          | Catechaldehyde                                                                                                                |
| 9                       | Lioxin                                                                                                              | 11         | Anisic acid                                                                                                                   |
| 12                      | <i>p</i> -Formylphenol                                                                                              | 13         | Piceol                                                                                                                        |
| 14                      | Hydroxyhydroquinone                                                                                                 | 15         | Catechol                                                                                                                      |
| 16                      | Rhododin                                                                                                            | 17         | Methyl 4-hydroxy-1,3-benzodioxole-5-acetate                                                                                   |
| 18                      | ( <i>E</i> )-3,3'-dimethoxy-4,4'-dihydroxystilbene                                                                  | 20         | Ethyl gallate                                                                                                                 |
| <b>Flavonoids</b>       |                                                                                                                     |            |                                                                                                                               |
| 1                       | Corvitin                                                                                                            | 2          | Kaemferol                                                                                                                     |
| 3                       | Tectochrysin                                                                                                        | 4          | Apigenin                                                                                                                      |
| 5                       | Crysin                                                                                                              | 6          | Diospyrosin                                                                                                                   |
| 7                       | Isoquercitrin                                                                                                       | 8          | Flacitrin                                                                                                                     |
| 9                       | Diosmetin                                                                                                           | 10         | Myricetin                                                                                                                     |
| <b>Phenylpropanoids</b> |                                                                                                                     |            |                                                                                                                               |
| 1                       | Fumalic acid                                                                                                        | 2          | 3-(2-hydroxy-4-methoxyphenyl)prop-2-enal                                                                                      |
| 3                       | Naringeninic acid                                                                                                   | 4          | Isocinnamic acid                                                                                                              |
| 5                       | Ferulaldehyde                                                                                                       | 6          | Methyl caffeate                                                                                                               |
| 7                       | Methyl <i>p</i> -coumarate                                                                                          | 8          | Caffeic acid                                                                                                                  |
| 9                       | Buxuletin                                                                                                           | 10         | Lyciumin                                                                                                                      |
| 11                      | 2-(3',5'-dimethoxy-4'-hydroxyphenyl)-3,7-dioxabicyclo[3.3.0]octan-6-one                                             | 12         | (2 <i>R</i> )-2,3-dihydroxy-1-(4-hydroxy-3-methoxyphenyl)propan-1-one                                                         |
| 13                      | $\beta$ -Hydroxypropiovanillone                                                                                     | 14         | $\beta$ -Hydroxypropiosyringone                                                                                               |
| 15                      | Syringylglycerol                                                                                                    | 16         | Methoxyphenyl-1-propanone                                                                                                     |
| 17                      | (1 <i>R</i> ,2 <i>S</i> )-1-(3-Methoxy-4-hydroxyphenyl)-2- <i>O</i> -[2-methoxy-4-(3-oxo-1-propenyl)phenyl]glycerol | 18         | (1 <i>R</i> ,2 <i>R</i> )-1-(3-Methoxy-4-hydroxyphenyl)-2-[2-methoxy-4-[( <i>E</i> )-2-formylethenyl]phenoxy]-1,3-propanediol |

|    |                                       |    |                                                    |
|----|---------------------------------------|----|----------------------------------------------------|
| 19 | Methyl 3- <i>O</i> -feruloylquininate | 20 | 4- <i>O</i> -Feruloylquinic acid methyl ester      |
| 21 | Methyl chlorogenate                   | 22 | Chlorogenic acid                                   |
| 23 | Methyl 5- <i>O</i> -feruloylquininate | 24 | 3,4-Di- <i>O</i> -caffeoylquinic acid methyl ester |
| 25 | 3,4-Di- <i>O</i> -Caffeoylquinic acid | 26 | 3,5-Dicaffeoylquinic acid                          |
| 27 | 1,3-Dicaffeoylquinic acid             | 28 | <i>d</i> -Pinoresinol                              |
| 29 | <i>epi</i> -Pinoresinol               | 30 | (-)-Medioresinol                                   |
| 31 | Asarinin B                            | 32 | (+)-Lirioresinol A                                 |
| 33 | (+)-Syringaresinol                    | 34 | Eleutheroside E <sub>1</sub>                       |
| 35 | 5-Benzofuranethanol                   | 36 | Dehydrodiconiferyl alcohol                         |
| 37 | Urolignoside                          | 38 | Ficusal                                            |
| 39 | Valdinol D                            | 40 | Buddlenol C                                        |
| 41 | Fructusol A                           | 42 | Xanthiumnolic C                                    |
| 43 | Umbelliferone                         | 44 | Esculetin                                          |

---

#### Alkaloids

---

|   |                                                      |   |                          |
|---|------------------------------------------------------|---|--------------------------|
| 1 | Stylopin                                             | 2 | Spallidamine             |
| 3 | 8-Oxocoptisine                                       | 4 | Noroxyhydrastinine       |
| 5 | 3-(Hydroxyacetyl)indole                              | 6 | $\beta$ -Indolylaldehyde |
| 7 | 5-(Methoxymethyl)-1 <i>H</i> -pyrrole-2-carbaldehyde | 8 | Methyl haematinimide     |
| 9 | Bocconoline                                          |   |                          |

---

#### Triterpenes and Steroids

---

|   |              |   |              |
|---|--------------|---|--------------|
| 1 | Betulin      | 2 | Betulic acid |
| 3 | Caryophyllin | 4 | Stigmasterol |
| 5 | Lupeol       | 6 | Malol        |

---

#### Other

---

|    |                                                                                  |    |                                   |
|----|----------------------------------------------------------------------------------|----|-----------------------------------|
| 1  | $\beta$ -D-galactopyranoside                                                     | 2  | Panaxcerol B                      |
| 3  | Linolic acid                                                                     | 4  | Elaidinic acid                    |
| 5  | Geraniol glucoside                                                               | 7  | Xanthoside                        |
| 8  | Xanthiazone                                                                      | 9  | 11 $\alpha$ ,13-Dihydrotomentosin |
| 10 | Xanthinosin                                                                      | 11 | (-)-Dihydroxanthatin              |
| 12 | Sundiversifolide                                                                 | 13 | Atractyligenin                    |
| 14 | 2- <i>O</i> -(2- <i>O</i> -Isovaleryl- $\beta$ -D-glucopyranosyl)attractyligenin |    |                                   |

---



**Table S2.** The score of molecular docking for compounds and 2D interaction diagrams.

| PTGS2                                                                                                                                          |                                                                                                                                                |                                                                                                                                                 |
|------------------------------------------------------------------------------------------------------------------------------------------------|------------------------------------------------------------------------------------------------------------------------------------------------|-------------------------------------------------------------------------------------------------------------------------------------------------|
| <p><b>Flavonoids 5</b></p> 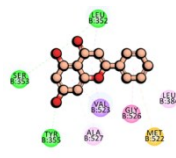 <p>LibDockScore: 102.5</p>        | <p><b>Others 9</b></p>  <p>LibDockScore: 98.2</p>             | <p><b>Phenylpropanoids 36</b></p>  <p>LibDockScore: 123.0</p> |
| <p><b>Phenolic acids 18</b></p>  <p>LibDockScore: 94.7</p>    | <p><b>Others 11</b></p>  <p>LibDockScore: 93.9</p>            | <p><b>Flavonoids 4</b></p>  <p>LibDockScore: 106.0</p>        |
| ALOX5                                                                                                                                          |                                                                                                                                                |                                                                                                                                                 |
| <p><b>Phenylpropanoids 1</b></p>  <p>LibDockScore: 99.3</p>  | <p><b>Phenylpropanoids 2</b></p>  <p>LibDockScore: 92.0</p>  | <p><b>Phenylpropanoids 3</b></p>  <p>LibDockScore: 86.7</p>  |
| <p><b>Phenylpropanoids 5</b></p>  <p>LibDockScore: 92.6</p> | <p><b>Phenylpropanoids 6</b></p>  <p>LibDockScore: 98.4</p> | <p><b>Phenylpropanoids 7</b></p>  <p>LibDockScore: 91.3</p> |

**Table S3.** The data of Elisa experiment.

| IL-2       |          |          |           |           |          |          |
|------------|----------|----------|-----------|-----------|----------|----------|
| pg/ml      | Control  | Model    | Clarityne | Low       | Middle   | High     |
|            | 576.3077 | 285.4615 | 514.6923  | 384.4615  | 445.0000 | 473.1538 |
|            | 584.3846 | 265.6923 | 565.8462  | 422.2308  | 472.3846 | 489.1538 |
|            | 481.9231 | 304.1538 | 463.3077  | 394.0769  | 508.0000 | 423.3077 |
|            | 526.9231 | 232.9231 | 454.5385  | 432.0000  | 508.5385 | 483.0769 |
|            | 464.7692 | 283.3846 | 421.9231  | 382.3077  | 409.9231 | 385.1538 |
|            | 540.3077 | 230.4615 | 348.4615  | 271.6923  | 370.7692 | 415.6923 |
|            | 484.0769 | 298.7692 | 388.7692  | 306.0000  | 451.0769 | 335.0000 |
| <b>AVE</b> | 522.6703 | 271.5495 | 451.0769  | 370.3956  | 452.2418 | 429.2198 |
| <b>STD</b> | 47.46421 | 29.86665 | 73.75927  | 59.54225  | 50.2767  | 56.95028 |
| IL-4       |          |          |           |           |          |          |
| pg/ml      | Control  | Model    | Clarityne | Low       | Middle   | High     |
|            | 205.5272 | 254.8363 | 239.4181  | 245.3454  | 258.8727 | 258.8363 |
|            | 230.3636 | 300.8727 | 231.0363  | 252.8000  | 276.0181 | 212.9454 |
|            | 177.8363 | 250.4727 | 257.8181  | 263.8545  | 269.8181 | 244.9272 |
|            | 194.4909 | 253.3454 | 244.0363  | 230.8000  | 233.9818 | 214.3272 |
|            | 190.9272 | 307.6545 | 203.6181  | 284.2545  | 240.1636 | 252.2909 |
|            | 208.1272 | 292.8000 | 225.5272  | 257.3272  | 234.8909 | 285.4545 |
|            | 218.4000 | 348.6909 | 262.7090  | 281.74545 | 245.8727 | 284.2545 |
| <b>AVE</b> | 203.6675 | 286.9532 | 237.7376  | 259.4467  | 251.3740 | 250.4337 |
| <b>STD</b> | 17.63920 | 36.42303 | 20.11399  | 19.14959  | 16.99936 | 29.39310 |

**Table S4.** The targets of potential active ingredients from Swiss Target Prediction database.

| Compound           | Target  | Swiss-Prot ID | Compound           | Target  | Swiss-Prot ID |
|--------------------|---------|---------------|--------------------|---------|---------------|
| Phenylpropanoids 1 | CA2     | P00918        | Phenylpropanoids 2 | CYP1B1  | Q16678        |
| Phenylpropanoids 1 | CA7     | P43166        | Phenylpropanoids 2 | ESR1    | P03372        |
| Phenylpropanoids 1 | CA1     | P00915        | Phenylpropanoids 2 | AKR1B1  | P15121        |
| Phenylpropanoids 1 | CA6     | P23280        | Phenylpropanoids 2 | ALOX5   | P09917        |
| Phenylpropanoids 1 | CA12    | O43570        | Phenylpropanoids 2 | CA2     | P00918        |
| Phenylpropanoids 1 | CA14    | Q9ULX7        | Phenylpropanoids 2 | CA1     | P00915        |
| Phenylpropanoids 1 | CA9     | Q16790        | Phenylpropanoids 2 | TLR4    | O00206        |
| Phenylpropanoids 1 | CA5A    | P35218        | Phenylpropanoids 2 | ESR2    | Q92731        |
| Phenylpropanoids 1 | CA5B    | Q9Y2D0        | Phenylpropanoids 2 | BACE1   | P56817        |
| Phenylpropanoids 1 | MAOB    | P27338        | Phenylpropanoids 2 | AHR     | P35869        |
| Phenylpropanoids 1 | ALOX5   | P09917        | Phenylpropanoids 2 | F3      | P13726        |
| Phenylpropanoids 1 | MMP9    | P14780        | Phenylpropanoids 2 | BCL2    | P10415        |
| Phenylpropanoids 1 | MMP1    | P03956        | Phenylpropanoids 2 | DAO     | P14920        |
| Phenylpropanoids 1 | MMP2    | P08253        | Phenylpropanoids 2 | MMP13   | P45452        |
| Phenylpropanoids 1 | PTPN1   | P18031        | Phenylpropanoids 2 | PIM1    | P11309        |
| Phenylpropanoids 3 | AKR1B1  | P15121        | Phenylpropanoids 4 | HCAR2   | Q8TDS4        |
| Phenylpropanoids 3 | CA2     | P00918        | Phenylpropanoids 4 | AKR1B1  | P15121        |
| Phenylpropanoids 3 | CA7     | P43166        | Phenylpropanoids 4 | TLR4    | O00206        |
| Phenylpropanoids 3 | ESR2    | Q92731        | Phenylpropanoids 4 | CA2     | P00918        |
| Phenylpropanoids 3 | CA1     | P00915        | Phenylpropanoids 4 | CA1     | P00915        |
| Phenylpropanoids 3 | CA3     | P07451        | Phenylpropanoids 4 | ESR2    | Q92731        |
| Phenylpropanoids 3 | CA6     | P23280        | Phenylpropanoids 4 | CA6     | P23280        |
| Phenylpropanoids 3 | CA12    | O43570        | Phenylpropanoids 4 | SLC16A1 | P53985        |
| Phenylpropanoids 3 | CA14    | Q9ULX7        | Phenylpropanoids 4 | CA7     | P43166        |
| Phenylpropanoids 3 | CA9     | Q16790        | Phenylpropanoids 4 | CA12    | O43570        |
| Phenylpropanoids 3 | CA4     | P22748        | Phenylpropanoids 4 | CA14    | Q9ULX7        |
| Phenylpropanoids 3 | CA5B    | Q9Y2D0        | Phenylpropanoids 4 | CA9     | Q16790        |
| Phenylpropanoids 3 | CA5A    | P35218        | Phenylpropanoids 4 | CA4     | P22748        |
| Phenylpropanoids 3 | MIF     | P14174        | Phenylpropanoids 4 | CA5B    | Q9Y2D0        |
| Phenylpropanoids 3 | ALOX5   | P09917        | Phenylpropanoids 4 | CA5A    | P35218        |
| Phenylpropanoids 5 | APP     | P05067        | Phenylpropanoids 6 | CA2     | P00918        |
| Phenylpropanoids 5 | CA2     | P00918        | Phenylpropanoids 6 | MMP2    | P08253        |
| Phenylpropanoids 5 | CA1     | P00915        | Phenylpropanoids 6 | CA7     | P43166        |
| Phenylpropanoids 5 | CA9     | Q16790        | Phenylpropanoids 6 | CA1     | P00915        |
| Phenylpropanoids 5 | NFE2L2  | Q16236        | Phenylpropanoids 6 | CA12    | O43570        |
| Phenylpropanoids 5 | CA7     | P43166        | Phenylpropanoids 6 | CA14    | Q9ULX7        |
| Phenylpropanoids 5 | CA12    | O43570        | Phenylpropanoids 6 | CA9     | Q16790        |
| Phenylpropanoids 5 | CA14    | Q9ULX7        | Phenylpropanoids 6 | CA6     | P23280        |
| Phenylpropanoids 5 | ALOX5   | P09917        | Phenylpropanoids 6 | CA5B    | Q9Y2D0        |
| Phenylpropanoids 5 | HSD11B1 | P28845        | Phenylpropanoids 6 | CA5A    | P35218        |
| Phenylpropanoids 5 | CA6     | P23280        | Phenylpropanoids 6 | ALOX5   | P09917        |
| Phenylpropanoids 5 | CA5A    | P35218        | Phenylpropanoids 6 | MMP9    | P14780        |

|                     |         |        |                     |         |        |
|---------------------|---------|--------|---------------------|---------|--------|
| Phenylpropanoids 5  | CYP1A1  | P04798 | Phenylpropanoids 6  | MAOB    | P27338 |
| Phenylpropanoids 5  | CYP1A2  | P05177 | Phenylpropanoids 6  | AKR1B10 | O60218 |
| Phenylpropanoids 5  | CYP1B1  | Q16678 | Phenylpropanoids 6  | AKR1B1  | P15121 |
| Phenylpropanoids 7  | CA2     | P00918 | Phenylpropanoids 8  | CA2     | P00918 |
| Phenylpropanoids 7  | CA7     | P43166 | Phenylpropanoids 8  | ALOX5   | P09917 |
| Phenylpropanoids 7  | CA1     | P00915 | Phenylpropanoids 8  | CA7     | P43166 |
| Phenylpropanoids 7  | CA12    | O43570 | Phenylpropanoids 8  | CA1     | P00915 |
| Phenylpropanoids 7  | CA14    | Q9ULX7 | Phenylpropanoids 8  | CA6     | P23280 |
| Phenylpropanoids 7  | CA9     | Q16790 | Phenylpropanoids 8  | MMP9    | P14780 |
| Phenylpropanoids 7  | AKR1B1  | P15121 | Phenylpropanoids 8  | CA12    | O43570 |
| Phenylpropanoids 7  | ESR2    | Q92731 | Phenylpropanoids 8  | MMP1    | P03956 |
| Phenylpropanoids 7  | CA4     | P22748 | Phenylpropanoids 8  | MMP2    | P08253 |
| Phenylpropanoids 7  | CA5B    | Q9Y2D0 | Phenylpropanoids 8  | PTPN1   | P18031 |
| Phenylpropanoids 7  | CA5A    | P35218 | Phenylpropanoids 8  | CA14    | Q9ULX7 |
| Phenylpropanoids 7  | CA6     | P23280 | Phenylpropanoids 8  | CA9     | Q16790 |
| Phenylpropanoids 7  | ALOX5   | P09917 | Phenylpropanoids 8  | CA5B    | Q9Y2D0 |
| Phenylpropanoids 7  | AKR1B10 | O60218 | Phenylpropanoids 8  | CA5A    | P35218 |
| Phenylpropanoids 7  | MAOB    | P27338 | Phenylpropanoids 8  | CA3     | P07451 |
| Phenylpropanoids 9  | CA7     | P43166 | Phenylpropanoids 10 | CA13    | Q8N1Q1 |
| Phenylpropanoids 9  | CA12    | O43570 | Phenylpropanoids 10 | ALOX5   | P09917 |
| Phenylpropanoids 9  | CA9     | Q16790 | Phenylpropanoids 10 | ERN1    | O75460 |
| Phenylpropanoids 9  | CA13    | Q8N1Q1 | Phenylpropanoids 10 | CA3     | P07451 |
| Phenylpropanoids 9  | CA1     | P00915 | Phenylpropanoids 10 | FFAR1   | O14842 |
| Phenylpropanoids 9  | CA14    | Q9ULX7 | Phenylpropanoids 10 | NR1H3   | Q13133 |
| Phenylpropanoids 9  | CA4     | P22748 | Phenylpropanoids 10 | NR1H2   | P55055 |
| Phenylpropanoids 9  | EGFR    | P00533 | Phenylpropanoids 10 | PIK3CD  | O00329 |
| Phenylpropanoids 9  | CA5A    | P35218 | Phenylpropanoids 10 | PRKDC   | P78527 |
| Phenylpropanoids 9  | XDH     | P47989 | Phenylpropanoids 10 | PIK3CB  | P42338 |
| Phenylpropanoids 9  | CA6     | P23280 | Phenylpropanoids 10 | HDAC8   | Q98Y41 |
| Phenylpropanoids 9  | CA2     | P00918 | Phenylpropanoids 10 | HDAC1   | Q13547 |
| Phenylpropanoids 9  | SRD5A1  | P18405 | Phenylpropanoids 10 | PIK3CG  | P48736 |
| Phenylpropanoids 9  | CBR1    | P16152 | Phenylpropanoids 10 | PIK3CA  | P42336 |
| Phenylpropanoids 9  | CDK2    | P24941 | Phenylpropanoids 10 | HTR2B   | P41595 |
| Phenylpropanoids 28 | SHBG    | P04278 | Phenylpropanoids 29 | ALOX5   | P09917 |
| Phenylpropanoids 28 | ALOX5   | P09917 | Phenylpropanoids 29 | MCL1    | Q07820 |
| Phenylpropanoids 28 | MAPK9   | P45984 | Phenylpropanoids 29 | MAPK9   | P45984 |
| Phenylpropanoids 28 | MCL1    | Q07820 | Phenylpropanoids 29 | PTAFR   | P25105 |
| Phenylpropanoids 28 | PTAFR   | P25105 | Phenylpropanoids 29 | OPRM1   | P35372 |
| Phenylpropanoids 28 | SLC5A2  | P31639 | Phenylpropanoids 29 | SOAT1   | P35610 |
| Phenylpropanoids 28 | SOAT1   | P35610 | Phenylpropanoids 29 | HIF1A   | Q16665 |
| Phenylpropanoids 28 | HIF1A   | Q16665 | Phenylpropanoids 29 | SOAT2   | O75908 |
| Phenylpropanoids 28 | SOAT2   | O75908 | Phenylpropanoids 29 | SHBG    | P04278 |
| Phenylpropanoids 28 | OPRM1   | P35372 | Phenylpropanoids 29 | CDK1    | P06493 |
| Phenylpropanoids 28 | PIK3CG  | P48736 | Phenylpropanoids 29 | CHEK1   | O14757 |

|                     |        |        |                     |          |        |
|---------------------|--------|--------|---------------------|----------|--------|
| Phenylpropanoids 28 | PIK3CA | P42336 | Phenylpropanoids 29 | WEE1     | P30291 |
| Phenylpropanoids 28 | GSK3B  | P49841 | Phenylpropanoids 29 | SCN9A    | Q15858 |
| Phenylpropanoids 28 | CDK2   | P24941 | Phenylpropanoids 29 | MTOR     | P42345 |
| Phenylpropanoids 28 | SCN9A  | Q15858 | Phenylpropanoids 29 | SLC22A12 | Q96537 |
| Phenylpropanoids 30 | ALOX5  | P09917 | Phenylpropanoids 31 | ALOX5    | P09917 |
| Phenylpropanoids 30 | MCL1   | Q07820 | Phenylpropanoids 31 | MCL1     | Q07820 |
| Phenylpropanoids 30 | PTAFR  | P25105 | Phenylpropanoids 31 | PTAFR    | P25105 |
| Phenylpropanoids 30 | SHBG   | P04278 | Phenylpropanoids 31 | OPRM1    | P35372 |
| Phenylpropanoids 30 | MMP1   | P03956 | Phenylpropanoids 31 | SOAT1    | P35610 |
| Phenylpropanoids 30 | MMP8   | P22894 | Phenylpropanoids 31 | HIF1A    | Q16665 |
| Phenylpropanoids 30 | CXCR2  | P25025 | Phenylpropanoids 31 | SOAT2    | O75908 |
| Phenylpropanoids 30 | CXCR1  | P25024 | Phenylpropanoids 31 | PIK3CG   | P48736 |
| Phenylpropanoids 30 | OPRM1  | P35372 | Phenylpropanoids 31 | PIK3CA   | P42336 |
| Phenylpropanoids 30 | SOAT1  | P35610 | Phenylpropanoids 31 | CDK1     | P06493 |
| Phenylpropanoids 30 | HIF1A  | Q16665 | Phenylpropanoids 31 | CHEK1    | O14757 |
| Phenylpropanoids 30 | SOAT2  | O75908 | Phenylpropanoids 31 | WEE1     | P30291 |
| Phenylpropanoids 30 | MMP7   | P09237 | Phenylpropanoids 31 | SHBG     | P04278 |
| Phenylpropanoids 30 | MAPK9  | P45984 | Phenylpropanoids 31 | CXCR2    | P25025 |
| Phenylpropanoids 30 | CDK1   | P06493 | Phenylpropanoids 31 | CXCR1    | P25024 |
| Phenylpropanoids 32 | ALOX5  | P09917 | Phenylpropanoids 33 | ALOX5    | P09917 |
| Phenylpropanoids 32 | MCL1   | Q07820 | Phenylpropanoids 33 | PTAFR    | P25105 |
| Phenylpropanoids 32 | PTAFR  | P25105 | Phenylpropanoids 33 | MCL1     | Q07820 |
| Phenylpropanoids 32 | SHBG   | P04278 | Phenylpropanoids 33 | MAPK9    | P45984 |
| Phenylpropanoids 32 | SOAT1  | P35610 | Phenylpropanoids 33 | SHBG     | P04278 |
| Phenylpropanoids 32 | HIF1A  | Q16665 | Phenylpropanoids 33 | SLC5A2   | P31639 |
| Phenylpropanoids 32 | SOAT2  | O75908 | Phenylpropanoids 33 | SOAT1    | P35610 |
| Phenylpropanoids 32 | CXCR2  | P25025 | Phenylpropanoids 33 | HIF1A    | Q16665 |
| Phenylpropanoids 32 | CXCR1  | P25024 | Phenylpropanoids 33 | SOAT2    | O75908 |
| Phenylpropanoids 32 | OPRM1  | P35372 | Phenylpropanoids 33 | SLC6A2   | P23975 |
| Phenylpropanoids 32 | MAPK9  | P45984 | Phenylpropanoids 33 | SLC6A4   | P31645 |
| Phenylpropanoids 32 | CDK1   | P06493 | Phenylpropanoids 33 | PIK3CG   | P48736 |
| Phenylpropanoids 32 | CHEK1  | O14757 | Phenylpropanoids 33 | PIK3CA   | P42336 |
| Phenylpropanoids 32 | WEE1   | P30291 | Phenylpropanoids 33 | CNR2     | P34972 |
| Phenylpropanoids 32 | MMP1   | P03956 | Phenylpropanoids 33 | CNR1     | P21554 |
| Phenylpropanoids 32 | ALOX5  | P09917 | Phenylpropanoids 33 | ALOX5    | P09917 |
| Phenylpropanoids 32 | MCL1   | Q07820 | Phenylpropanoids 33 | PTAFR    | P25105 |
| Phenylpropanoids 32 | PTAFR  | P25105 | Phenylpropanoids 33 | MCL1     | Q07820 |
| Phenylpropanoids 32 | SHBG   | P04278 | Phenylpropanoids 33 | MAPK9    | P45984 |
| Phenylpropanoids 32 | SOAT1  | P35610 | Phenylpropanoids 33 | SHBG     | P04278 |
| Phenylpropanoids 32 | HIF1A  | Q16665 | Phenylpropanoids 33 | SLC5A2   | P31639 |
| Phenylpropanoids 32 | SOAT2  | O75908 | Phenylpropanoids 33 | SOAT1    | P35610 |
| Phenylpropanoids 32 | CXCR2  | P25025 | Phenylpropanoids 33 | HIF1A    | Q16665 |
| Phenylpropanoids 32 | CXCR1  | P25024 | Phenylpropanoids 33 | SOAT2    | O75908 |
| Phenylpropanoids 32 | OPRM1  | P35372 | Phenylpropanoids 33 | SLC6A2   | P23975 |

|                     |         |        |                     |         |        |
|---------------------|---------|--------|---------------------|---------|--------|
| Phenylpropanoids 32 | MAPK9   | P45984 | Phenylpropanoids 33 | SLC6A4  | P31645 |
| Phenylpropanoids 32 | CDK1    | P06493 | Phenylpropanoids 33 | PIK3CG  | P48736 |
| Phenylpropanoids 32 | CHEK1   | O14757 | Phenylpropanoids 33 | PIK3CA  | P42336 |
| Phenylpropanoids 32 | WEE1    | P30291 | Phenylpropanoids 33 | CNR2    | P34972 |
| Phenylpropanoids 32 | MMP1    | P03956 | Phenylpropanoids 33 | CNR1    | P21554 |
| Phenylpropanoids 43 | CA12    | O43570 | Phenylpropanoids 44 | XDH     | P47989 |
| Phenylpropanoids 43 | CA9     | Q16790 | Phenylpropanoids 44 | EGFR    | P00533 |
| Phenylpropanoids 43 | CA7     | P43166 | Phenylpropanoids 44 | CA12    | O43570 |
| Phenylpropanoids 43 | EGFR    | P00533 | Phenylpropanoids 44 | CA9     | Q16790 |
| Phenylpropanoids 43 | XDH     | P47989 | Phenylpropanoids 44 | AKR1B1  | P15121 |
| Phenylpropanoids 43 | CA5A    | P35218 | Phenylpropanoids 44 | CA7     | P43166 |
| Phenylpropanoids 43 | CA1     | P00915 | Phenylpropanoids 44 | CA13    | Q8N1Q1 |
| Phenylpropanoids 43 | CA14    | Q9ULX7 | Phenylpropanoids 44 | CA2     | P00918 |
| Phenylpropanoids 43 | HSD17B3 | P37058 | Phenylpropanoids 44 | CA1     | P00915 |
| Phenylpropanoids 43 | CA2     | P00918 | Phenylpropanoids 44 | CA14    | Q9ULX7 |
| Phenylpropanoids 43 | CA3     | P07451 | Phenylpropanoids 44 | SQLE    | Q14534 |
| Phenylpropanoids 43 | AKR1B1  | P15121 | Phenylpropanoids 44 | GPR35   | Q9HC97 |
| Phenylpropanoids 43 | DAO     | P14920 | Phenylpropanoids 44 | CCND1   | P24385 |
| Phenylpropanoids 43 | ESR2    | Q92731 | Phenylpropanoids 44 | FLT4    | P35916 |
| Phenylpropanoids 43 | CA13    | Q8N1Q1 | Phenylpropanoids 44 | INSR    | P06213 |
| Anthraquinones 1    | ELANE   | P08246 | Anthraquinones 2    | ELANE   | P08246 |
| Anthraquinones 1    | ESR2    | Q92731 | Anthraquinones 2    | LCK     | P06239 |
| Anthraquinones 1    | CSNK2A1 | P68400 | Anthraquinones 2    | EGFR    | P00533 |
| Anthraquinones 1    | PTP4A3  | O75365 | Anthraquinones 2    | PIM1    | P11309 |
| Anthraquinones 1    | PIM1    | P11309 | Anthraquinones 2    | DUSP3   | P51452 |
| Anthraquinones 1    | ESR1    | P03372 | Anthraquinones 2    | LIMK1   | P53667 |
| Anthraquinones 1    | FTO     | Q9C0B1 | Anthraquinones 2    | ESR2    | Q92731 |
| Anthraquinones 1    | MCL1    | Q07820 | Anthraquinones 2    | ESR1    | P03372 |
| Anthraquinones 1    | BCL2    | P10415 | Anthraquinones 2    | CSNK2A1 | P68400 |
| Anthraquinones 1    | CYP19A1 | P11511 | Anthraquinones 2    | CYP1B1  | Q16678 |
| Anthraquinones 1    | FNTA    | P49354 | Anthraquinones 2    | RET     | P07949 |
| Anthraquinones 1    | EGFR    | P00533 | Anthraquinones 2    | KDR     | P35968 |
| Anthraquinones 1    | LCK     | P06239 | Anthraquinones 2    | BCL2    | P10415 |
| Anthraquinones 1    | CISD1   | Q9NZ45 | Anthraquinones 2    | KCNA3   | P22001 |
| Anthraquinones 1    | CA7     | P43166 | Anthraquinones 2    | MCL1    | Q07820 |
| Anthraquinones 9    | ELANE   | P08246 | Anthraquinones 12   | ELANE   | P08246 |
| Anthraquinones 9    | EGFR    | P00533 | Anthraquinones 12   | LIMK1   | P53667 |
| Anthraquinones 9    | LIMK1   | P53667 | Anthraquinones 12   | PTP4A3  | O75365 |
| Anthraquinones 9    | LCK     | P06239 | Anthraquinones 12   | LCK     | P06239 |
| Anthraquinones 9    | CSNK2A1 | P68400 | Anthraquinones 12   | ESR1    | P03372 |
| Anthraquinones 9    | DUSP3   | P51452 | Anthraquinones 12   | ESR2    | Q92731 |
| Anthraquinones 9    | PTP4A3  | O75365 | Anthraquinones 12   | CSNK2A1 | P68400 |
| Anthraquinones 9    | ESR2    | Q92731 | Anthraquinones 12   | PIM1    | P11309 |
| Anthraquinones 9    | PIM1    | P11309 | Anthraquinones 12   | MCL1    | Q07820 |

|                   |         |        |                   |          |        |
|-------------------|---------|--------|-------------------|----------|--------|
| Anthraquinones 9  | ESR1    | P03372 | Anthraquinones 12 | EGFR     | P00533 |
| Anthraquinones 9  | MCL1    | Q07820 | Anthraquinones 12 | DUSP3    | P51452 |
| Anthraquinones 9  | BCL2    | P10415 | Anthraquinones 12 | BCL2     | P10415 |
| Anthraquinones 9  | KCNA3   | P22001 | Anthraquinones 12 | FTO      | Q9C0B1 |
| Anthraquinones 9  | FTO     | Q9C0B1 | Anthraquinones 12 | MMP3     | P08254 |
| Anthraquinones 9  | MAOA    | P21397 | Anthraquinones 12 | MMP1     | P03956 |
| Anthraquinones 15 | ELANE   | P08246 | Phenolic acids 2  | FUT7     | Q11130 |
| Anthraquinones 15 | EGFR    | P00533 | Phenolic acids 2  | CA2      | P00918 |
| Anthraquinones 15 | LCK     | P06239 | Phenolic acids 2  | CA7      | P43166 |
| Anthraquinones 15 | DUSP3   | P51452 | Phenolic acids 2  | CA1      | P00915 |
| Anthraquinones 15 | ESR2    | Q92731 | Phenolic acids 2  | CA12     | O43570 |
| Anthraquinones 15 | PIM1    | P11309 | Phenolic acids 2  | CA14     | Q9ULX7 |
| Anthraquinones 15 | LIMK1   | P53667 | Phenolic acids 2  | CA9      | Q16790 |
| Anthraquinones 15 | CSNK2A1 | P68400 | Phenolic acids 2  | CA3      | P07451 |
| Anthraquinones 15 | BACE1   | P56817 | Phenolic acids 2  | CA6      | P23280 |
| Anthraquinones 15 | CYP19A1 | P11511 | Phenolic acids 2  | CA4      | P22748 |
| Anthraquinones 15 | ESR1    | P03372 | Phenolic acids 2  | CA5B     | Q9Y2D0 |
| Anthraquinones 15 | ADORA3  | P0DMS8 | Phenolic acids 2  | CA5A     | P35218 |
| Anthraquinones 15 | AKR1C3  | P42330 | Phenolic acids 2  | CA13     | Q8N1Q1 |
| Anthraquinones 15 | RET     | P07949 | Phenolic acids 2  | SQLE     | Q14534 |
| Anthraquinones 15 | KDR     | P35968 | Phenolic acids 2  | SERPINE1 | P05121 |
| Phenolic acids 3  | CA2     | P00918 | Phenolic acids 4  | ERN1     | O75460 |
| Phenolic acids 3  | CA7     | P43166 | Phenolic acids 4  | CA2      | P00918 |
| Phenolic acids 3  | CA1     | P00915 | Phenolic acids 4  | CA7      | P43166 |
| Phenolic acids 3  | CA3     | P07451 | Phenolic acids 4  | CA3      | P07451 |
| Phenolic acids 3  | CA6     | P23280 | Phenolic acids 4  | CA6      | P23280 |
| Phenolic acids 3  | CA12    | O43570 | Phenolic acids 4  | CA14     | Q9ULX7 |
| Phenolic acids 3  | CA14    | Q9ULX7 | Phenolic acids 4  | CA5A     | P35218 |
| Phenolic acids 3  | CA9     | Q16790 | Phenolic acids 4  | CA1      | P00915 |
| Phenolic acids 3  | CA5A    | P35218 | Phenolic acids 4  | CA12     | O43570 |
| Phenolic acids 3  | CA4     | P22748 | Phenolic acids 4  | CA9      | Q16790 |
| Phenolic acids 3  | FUT7    | Q11130 | Phenolic acids 4  | ACHE     | P22303 |
| Phenolic acids 3  | CA13    | Q8N1Q1 | Phenolic acids 4  | TTR      | P02766 |
| Phenolic acids 3  | CA5B    | Q9Y2D0 | Phenolic acids 4  | CA4      | P22748 |
| Phenolic acids 3  | TPMT    | P51580 | Phenolic acids 4  | ERCC5    | P28715 |
| Phenolic acids 3  | AKR1C3  | P42330 | Phenolic acids 4  | FEN1     | P39748 |
| Phenolic acids 5  | CA2     | P00918 | Phenolic acids 6  | CA2      | P00918 |
| Phenolic acids 5  | CA7     | P43166 | Phenolic acids 6  | CA7      | P43166 |
| Phenolic acids 5  | CA1     | P00915 | Phenolic acids 6  | CA1      | P00915 |
| Phenolic acids 5  | CA12    | O43570 | Phenolic acids 6  | CA12     | O43570 |
| Phenolic acids 5  | CA14    | Q9ULX7 | Phenolic acids 6  | CA14     | Q9ULX7 |
| Phenolic acids 5  | CA9     | Q16790 | Phenolic acids 6  | CA9      | Q16790 |
| Phenolic acids 5  | CA3     | P07451 | Phenolic acids 6  | SQLE     | Q14534 |
| Phenolic acids 5  | CA6     | P23280 | Phenolic acids 6  | FUT7     | Q11130 |

|                   |        |        |                   |          |        |
|-------------------|--------|--------|-------------------|----------|--------|
| Phenolic acids 5  | CA5A   | P35218 | Phenolic acids 6  | CA13     | Q8N1Q1 |
| Phenolic acids 5  | CA4    | P22748 | Phenolic acids 6  | CA5B     | Q9Y2D0 |
| Phenolic acids 5  | TPMT   | P51580 | Phenolic acids 6  | SERPINE1 | P05121 |
| Phenolic acids 5  | TTR    | P02766 | Phenolic acids 6  | IGF1R    | P08069 |
| Phenolic acids 5  | CA5B   | Q9Y2D0 | Phenolic acids 6  | ALK      | Q9UM73 |
| Phenolic acids 5  | CA13   | Q8N1Q1 | Phenolic acids 6  | CA3      | P07451 |
| Phenolic acids 5  | FUT7   | Q11130 | Phenolic acids 6  | CA4      | P22748 |
| Phenolic acids 7  | CA2    | P00918 | Phenolic acids 8  | CA6      | P23280 |
| Phenolic acids 7  | CA7    | P43166 | Phenolic acids 8  | CA4      | P22748 |
| Phenolic acids 7  | CA1    | P00915 | Phenolic acids 8  | CA2      | P00918 |
| Phenolic acids 7  | CA6    | P23280 | Phenolic acids 8  | TYR      | P14679 |
| Phenolic acids 7  | CA12   | O43570 | Phenolic acids 8  | CA3      | P07451 |
| Phenolic acids 7  | CA14   | Q9ULX7 | Phenolic acids 8  | FUT7     | Q11130 |
| Phenolic acids 7  | CA9    | Q16790 | Phenolic acids 8  | CA5B     | Q9Y2D0 |
| Phenolic acids 7  | CA4    | P22748 | Phenolic acids 8  | CA5A     | P35218 |
| Phenolic acids 7  | CA3    | P07451 | Phenolic acids 8  | ERN1     | O75460 |
| Phenolic acids 7  | CA5B   | Q9Y2D0 | Phenolic acids 8  | CA7      | P43166 |
| Phenolic acids 7  | CA5A   | P35218 | Phenolic acids 8  | CA1      | P00915 |
| Phenolic acids 7  | CA13   | Q8N1Q1 | Phenolic acids 8  | CA12     | O43570 |
| Phenolic acids 7  | FUT7   | Q11130 | Phenolic acids 8  | CA14     | Q9ULX7 |
| Phenolic acids 7  | SQLE   | Q14534 | Phenolic acids 8  | CA9      | Q16790 |
| Phenolic acids 7  | LDHA   | P00338 | Phenolic acids 8  | COMT     | P21964 |
| Phenolic acids 9  | ERN1   | O75460 | Phenolic acids 11 | CA2      | P00918 |
| Phenolic acids 9  | CA2    | P00918 | Phenolic acids 11 | CA1      | P00915 |
| Phenolic acids 9  | CA7    | P43166 | Phenolic acids 11 | CA7      | P43166 |
| Phenolic acids 9  | CA1    | P00915 | Phenolic acids 11 | CA3      | P07451 |
| Phenolic acids 9  | CA12   | O43570 | Phenolic acids 11 | CA12     | O43570 |
| Phenolic acids 9  | CA14   | Q9ULX7 | Phenolic acids 11 | CA14     | Q9ULX7 |
| Phenolic acids 9  | CA9    | Q16790 | Phenolic acids 11 | CA9      | Q16790 |
| Phenolic acids 9  | CA4    | P22748 | Phenolic acids 11 | CA4      | P22748 |
| Phenolic acids 9  | CA3    | P07451 | Phenolic acids 11 | CA5A     | P35218 |
| Phenolic acids 9  | CA6    | P23280 | Phenolic acids 11 | CA5B     | Q9Y2D0 |
| Phenolic acids 9  | CA5A   | P35218 | Phenolic acids 11 | CA13     | Q8N1Q1 |
| Phenolic acids 9  | CDC25B | P30305 | Phenolic acids 11 | MAOB     | P27338 |
| Phenolic acids 9  | TTR    | P02766 | Phenolic acids 11 | CHRNA7   | P36544 |
| Phenolic acids 9  | NAT1   | P18440 | Phenolic acids 11 | AHR      | P35869 |
| Phenolic acids 9  | ALPG   | P10696 | Phenolic acids 11 | TTR      | P02766 |
| Phenolic acids 12 | ERN1   | O75460 | Phenolic acids 13 | ALDH5A1  | P51649 |
| Phenolic acids 12 | CA2    | P00918 | Phenolic acids 13 | ABAT     | P80404 |
| Phenolic acids 12 | CA7    | P43166 | Phenolic acids 13 | ERN1     | O75460 |
| Phenolic acids 12 | CA1    | P00915 | Phenolic acids 13 | COMT     | P21964 |
| Phenolic acids 12 | CA3    | P07451 | Phenolic acids 13 | CA12     | O43570 |
| Phenolic acids 12 | CA6    | P23280 | Phenolic acids 13 | CA9      | Q16790 |
| Phenolic acids 12 | CA12   | O43570 | Phenolic acids 13 | SRD5A2   | P31213 |

|                   |         |        |                   |         |        |
|-------------------|---------|--------|-------------------|---------|--------|
| Phenolic acids 12 | CA14    | Q9ULX7 | Phenolic acids 13 | HSD17B1 | P14061 |
| Phenolic acids 12 | CA9     | Q16790 | Phenolic acids 13 | HTR6    | P50406 |
| Phenolic acids 12 | CA4     | P22748 | Phenolic acids 13 | ESRRG   | P62508 |
| Phenolic acids 12 | CA5B    | Q9Y2D0 | Phenolic acids 13 | DYRK1A  | Q13627 |
| Phenolic acids 12 | CA5A    | P35218 | Phenolic acids 13 | CLK1    | P49759 |
| Phenolic acids 12 | CA13    | Q8N1Q1 | Phenolic acids 13 | DYRK1B  | Q9Y463 |
| Phenolic acids 12 | COMT    | P21964 | Phenolic acids 13 | FASN    | P49327 |
| Phenolic acids 12 | ACHE    | P22303 | Phenolic acids 13 | CA7     | P43166 |
| Phenolic acids 14 | FYN     | P06241 | Phenolic acids 15 | CA2     | P00918 |
| Phenolic acids 14 | EGFR    | P00533 | Phenolic acids 15 | CA12    | O43570 |
| Phenolic acids 14 | CA2     | P00918 | Phenolic acids 15 | CA5B    | Q9Y2D0 |
| Phenolic acids 14 | CA1     | P00915 | Phenolic acids 15 | CA3     | P07451 |
| Phenolic acids 14 | CA6     | P23280 | Phenolic acids 15 | CA9     | Q16790 |
| Phenolic acids 14 | NQO2    | P16083 | Phenolic acids 15 | PTPN22  | Q9Y2R2 |
| Phenolic acids 14 | CA12    | O43570 | Phenolic acids 15 | CA4     | P22748 |
| Phenolic acids 14 | CA4     | P22748 | Phenolic acids 15 | EGFR    | P00533 |
| Phenolic acids 14 | CA5B    | Q9Y2D0 | Phenolic acids 15 | CA1     | P00915 |
| Phenolic acids 14 | CA5A    | P35218 | Phenolic acids 15 | FYN     | P06241 |
| Phenolic acids 14 | CA3     | P07451 | Phenolic acids 15 | CA6     | P23280 |
| Phenolic acids 14 | CA9     | Q16790 | Phenolic acids 15 | IDO1    | P14902 |
| Phenolic acids 14 | MAOB    | P27338 | Phenolic acids 15 | CA5A    | P35218 |
| Phenolic acids 14 | LCK     | P06239 | Phenolic acids 15 | HDAC6   | Q9UBN7 |
| Phenolic acids 14 | TYR     | P14679 | Phenolic acids 15 | HDAC8   | Q9BY41 |
| Phenolic acids 17 | CDK5R1  | Q15078 | Phenolic acids 18 | NQO2    | P16083 |
| Phenolic acids 17 | CDK2    | P24941 | Phenolic acids 18 | CYP1B1  | Q16678 |
| Phenolic acids 17 | CDK9    | P50750 | Phenolic acids 18 | CYP1A2  | P05177 |
| Phenolic acids 17 | DYRK1A  | Q13627 | Phenolic acids 18 | CYP1A1  | P04798 |
| Phenolic acids 17 | ALPL    | P05186 | Phenolic acids 18 | PTGS1   | P23219 |
| Phenolic acids 17 | AOC3    | Q16853 | Phenolic acids 18 | TUBB1   | Q9H4B7 |
| Phenolic acids 17 | EGFR    | P00533 | Phenolic acids 18 | ESR1    | P03372 |
| Phenolic acids 17 | EGLN1   | Q9GZT9 | Phenolic acids 18 | RELA    | Q04206 |
| Phenolic acids 17 | RP56KA3 | P51812 | Phenolic acids 18 | TUBB3   | Q13509 |
| Phenolic acids 17 | ADORA2A | P29274 | Phenolic acids 18 | PTGS2   | P35354 |
| Phenolic acids 17 | ADORA2B | P29275 | Phenolic acids 18 | APP     | P05067 |
| Phenolic acids 17 | IDO1    | P14902 | Phenolic acids 18 | AHR     | P35869 |
| Phenolic acids 17 | F2      | P00734 | Phenolic acids 18 | ABCB1   | P08183 |
| Phenolic acids 17 | TERT    | O14746 | Phenolic acids 18 | MAOA    | P21397 |
| Phenolic acids 17 | GPR84   | Q9NQ55 | Phenolic acids 18 | CA2     | P00918 |
| Flavonoid 3       | ABCB1   | P08183 | Flavonoid 4       | NOX4    | Q9NPH5 |
| Flavonoid 3       | ABCG2   | Q9UNQ0 | Flavonoid 4       | AKR1B1  | P15121 |
| Flavonoid 3       | CYP1B1  | Q16678 | Flavonoid 4       | CDK5R1  | Q15078 |
| Flavonoid 3       | PTGS2   | P35354 | Flavonoid 4       | XDH     | P47989 |
| Flavonoid 3       | CYP19A1 | P11511 | Flavonoid 4       | MAOA    | P21397 |
| Flavonoid 3       | TNKS    | O95271 | Flavonoid 4       | FLT3    | P36888 |



|             |         |        |             |          |        |
|-------------|---------|--------|-------------|----------|--------|
| Flavonoid 3 | AKR1B1  | P15121 | Flavonoid 4 | CYP19A1  | P11511 |
| Flavonoid 3 | CA2     | P00918 | Flavonoid 4 | ESR1     | P03372 |
| Flavonoid 3 | CA1     | P00915 | Flavonoid 4 | CCNB3    | Q8WWL7 |
| Flavonoid 3 | CA12    | O43570 | Flavonoid 4 | ACHE     | P22303 |
| Flavonoid 3 | CA9     | Q16790 | Flavonoid 4 | ADORA1   | P30542 |
| Flavonoid 3 | FLT3    | P36888 | Flavonoid 4 | PTGS2    | P35354 |
| Flavonoid 3 | MAOA    | P21397 | Flavonoid 4 | ESR2     | Q92731 |
| Flavonoid 3 | ADORA1  | P30542 | Flavonoid 4 | CDK6     | Q00534 |
| Flavonoid 3 | ADORA3  | P0DMS8 | Flavonoid 4 | ADORA2A  | P29274 |
| Flavonoid 5 | AKR1B1  | P15121 | Flavonoid 6 | CNR1     | P21554 |
| Flavonoid 5 | CDK5R1  | Q15078 | Flavonoid 6 | CNR2     | P34972 |
| Flavonoid 5 | XDH     | P47989 | Flavonoid 6 | OPRM1    | P35372 |
| Flavonoid 5 | CYP19A1 | P11511 | Flavonoid 6 | OPRD1    | P41143 |
| Flavonoid 5 | CA2     | P00918 | Flavonoid 6 | F10      | P00742 |
| Flavonoid 5 | CCNB3   | Q8WWL7 | Flavonoid 6 | SLC10A2  | Q12908 |
| Flavonoid 5 | CA7     | P43166 | Flavonoid 6 | ROCK2    | O75116 |
| Flavonoid 5 | CDK6    | Q00534 | Flavonoid 6 | BRD4     | O60885 |
| Flavonoid 5 | CA1     | P00915 | Flavonoid 6 | BRD3     | Q15059 |
| Flavonoid 5 | CA12    | O43570 | Flavonoid 6 | PTGDR2   | Q9Y5Y4 |
| Flavonoid 5 | CA9     | Q16790 | Flavonoid 6 | SYK      | P43405 |
| Flavonoid 5 | CA4     | P22748 | Flavonoid 6 | BRD2     | P25440 |
| Flavonoid 5 | ABCB1   | P08183 | Flavonoid 6 | DPP4     | P27487 |
| Flavonoid 5 | CYP1B1  | Q16678 | Flavonoid 6 | P2RY12   | Q9H244 |
| Flavonoid 5 | ABCG2   | Q9UNQ0 | Flavonoid 6 | PDE4B    | Q07343 |
| Alkaloids 1 | DRD1    | P21728 | Alkaloids 2 | CA2      | P00918 |
| Alkaloids 1 | F3      | P13726 | Alkaloids 2 | SLC22A12 | Q96537 |
| Alkaloids 1 | DRD2    | P14416 | Alkaloids 2 | CA1      | P00915 |
| Alkaloids 1 | HTR1A   | P08908 | Alkaloids 2 | AKR1B1   | P15121 |
| Alkaloids 1 | CHRM4   | P08173 | Alkaloids 2 | ADAMTS4  | O75173 |
| Alkaloids 1 | HTR7    | P34969 | Alkaloids 2 | BMP1     | P13497 |
| Alkaloids 1 | SLC6A3  | Q01959 | Alkaloids 2 | BCAT2    | O15382 |
| Alkaloids 1 | ADRA1D  | P25100 | Alkaloids 2 | PTGS2    | P35354 |
| Alkaloids 1 | DRD3    | P35462 | Alkaloids 2 | PDE4B    | Q07343 |
| Alkaloids 1 | SIGMAR1 | Q99720 | Alkaloids 2 | PTPN22   | Q9Y2R2 |
| Alkaloids 1 | ADRA1A  | P35348 | Alkaloids 2 | PYGL     | P06737 |
| Alkaloids 1 | DRD4    | P21917 | Alkaloids 2 | ACE      | P12821 |
| Alkaloids 1 | ADRA1B  | P35368 | Alkaloids 2 | MME      | P08473 |
| Alkaloids 1 | DRD5    | P21918 | Alkaloids 2 | PTGDR2   | Q9Y5Y4 |
| Alkaloids 1 | ADRB2   | P07550 | Alkaloids 2 | CA12     | O43570 |
| Alkaloids 3 | GRK3    | P35626 | Alkaloids 4 | SLC6A3   | Q01959 |
| Alkaloids 3 | SAE1    | Q9UBE0 | Alkaloids 4 | KIF11    | P52732 |
| Alkaloids 3 | GRK2    | P25098 | Alkaloids 4 | DHCR7    | Q9UBM7 |
| Alkaloids 3 | CDC25A  | P30304 | Alkaloids 4 | ACHE     | P22303 |
| Alkaloids 3 | CDC25B  | P30305 | Alkaloids 4 | ABCB1    | P08183 |

|             |        |        |             |         |        |
|-------------|--------|--------|-------------|---------|--------|
| Alkaloids 3 | ABL1   | P00519 | Alkaloids 4 | HTR2B   | P41595 |
| Alkaloids 3 | CHEK2  | O96017 | Alkaloids 4 | HTR2A   | P28223 |
| Alkaloids 3 | PDE5A  | O76074 | Alkaloids 4 | HTR2C   | P28335 |
| Alkaloids 3 | CDK2   | P24941 | Alkaloids 4 | NQO2    | P16083 |
| Alkaloids 3 | CDK4   | P11802 | Alkaloids 4 | CA2     | P00918 |
| Alkaloids 3 | GRK5   | P34947 | Alkaloids 4 | DRD2    | P14416 |
| Alkaloids 3 | PARP1  | P09874 | Alkaloids 4 | CA9     | Q16790 |
| Alkaloids 3 | TTK    | P33981 | Alkaloids 4 | CA1     | P00915 |
| Alkaloids 3 | CSF1R  | P07333 | Alkaloids 4 | CA14    | Q9ULX7 |
| Alkaloids 3 | MAPK8  | P45983 | Alkaloids 4 | DYRK1A  | Q13627 |
| Alkaloids 5 | PIM1   | P11309 | Alkaloids 6 | CYP2A6  | P11509 |
| Alkaloids 5 | MPO    | P05164 | Alkaloids 6 | IMPDH2  | P12268 |
| Alkaloids 5 | ACPP   | P15309 | Alkaloids 6 | PARP1   | P09874 |
| Alkaloids 5 | CES1   | P23141 | Alkaloids 6 | PIM3    | Q86V86 |
| Alkaloids 5 | CES2   | O00748 | Alkaloids 6 | ERN1    | O75460 |
| Alkaloids 5 | NUDT1  | P36639 | Alkaloids 6 | NOS2    | P35228 |
| Alkaloids 5 | PIM3   | Q86V86 | Alkaloids 6 | PIM1    | P11309 |
| Alkaloids 5 | DAO    | P14920 | Alkaloids 6 | PIM2    | Q9P1W9 |
| Alkaloids 5 | CA6    | P23280 | Alkaloids 6 | TPO     | P07202 |
| Alkaloids 5 | CA14   | Q9ULX7 | Alkaloids 6 | MALT1   | Q9UDY8 |
| Alkaloids 5 | CA4    | P22748 | Alkaloids 6 | CCR1    | P32246 |
| Alkaloids 5 | CA13   | Q8N1Q1 | Alkaloids 6 | MCL1    | Q07820 |
| Alkaloids 5 | CA5B   | Q9Y2D0 | Alkaloids 6 | KIF11   | P52732 |
| Alkaloids 5 | CA5A   | P35218 | Alkaloids 6 | CAPN1   | P07384 |
| Alkaloids 5 | CDK5R1 | Q15078 | Alkaloids 6 | ADH1B   | P00325 |
| Alkaloids 7 | PPP5C  | Q9BPW0 | Alkaloids 8 | PTPN1   | P18031 |
| Alkaloids 7 | PPP1CA | P62136 | Alkaloids 8 | AKR1B1  | P15121 |
| Alkaloids 7 | ELANE  | P08246 | Alkaloids 8 | MALT1   | Q9UDY8 |
| Alkaloids 7 | PPP1CC | P36873 | Alkaloids 8 | KDM5C   | P41229 |
| Alkaloids 7 | PLAUR  | Q03405 | Alkaloids 8 | KDM4B   | O94953 |
| Alkaloids 7 | PPM1B  | O75688 | Alkaloids 8 | KDM5B   | Q9UGL1 |
| Alkaloids 7 | PSEN2  | P49810 | Alkaloids 8 | KDM4A   | O75164 |
| Alkaloids 7 | CHRM4  | P08173 | Alkaloids 8 | AKR1A1  | P14550 |
| Alkaloids 7 | CHRM2  | P08172 | Alkaloids 8 | AKR1B10 | O60218 |
| Alkaloids 7 | MAOB   | P27338 | Alkaloids 8 | PTPRC   | P08575 |
| Alkaloids 7 | AOC3   | Q16853 | Alkaloids 8 | NAMPT   | P43490 |
| Alkaloids 7 | MTNR1A | P48039 | Alkaloids 8 | CA2     | P00918 |
| Alkaloids 7 | BCHE   | P06276 | Alkaloids 8 | CA1     | P00915 |
| Alkaloids 7 | PTGS2  | P35354 | Alkaloids 8 | CA12    | O43570 |
| Alkaloids 7 | PARP1  | P09874 | Alkaloids 8 | CA9     | Q16790 |
| Alkaloids 9 | ROCK2  | O75116 | Others 9    | FNTA    | P49354 |
| Alkaloids 9 | ROCK1  | Q13464 | Others 9    | PTPN1   | P18031 |
| Alkaloids 9 | SCN9A  | Q15858 | Others 9    | HSD11B1 | P28845 |
| Alkaloids 9 | ABCC9  | O60706 | Others 9    | F2      | P00734 |

|             |         |        |           |         |        |
|-------------|---------|--------|-----------|---------|--------|
| Alkaloids 9 | MKNK2   | Q9HBH9 | Others 9  | PRSS1   | P07477 |
| Alkaloids 9 | EPHB4   | P54760 | Others 9  | CYP19A1 | P11511 |
| Alkaloids 9 | ALOX5AP | P20292 | Others 9  | HMGCR   | P04035 |
| Alkaloids 9 | CCNE2   | O96020 | Others 9  | AR      | P10275 |
| Alkaloids 9 | TK1     | P04183 | Others 9  | PGR     | P06401 |
| Alkaloids 9 | MTOR    | P42345 | Others 9  | HSD17B2 | P37059 |
| Alkaloids 9 | PIK3CA  | P42336 | Others 9  | NR3C1   | P04150 |
| Alkaloids 9 | AURKA   | O14965 | Others 9  | CES2    | O00748 |
| Alkaloids 9 | CDK2    | P24941 | Others 9  | PTGES   | O14684 |
| Alkaloids 9 | CFD     | P00746 | Others 9  | PTGS2   | P35354 |
| Alkaloids 9 | CHEK1   | O14757 | Others 9  | NR3C2   | P08235 |
| Alkaloids 9 | ROCK2   | O75116 | Others 9  | FNTA    | P49354 |
| Alkaloids 9 | ROCK1   | Q13464 | Others 9  | PTPN1   | P18031 |
| Alkaloids 9 | SCN9A   | Q15858 | Others 9  | HSD11B1 | P28845 |
| Alkaloids 9 | ABCC9   | O60706 | Others 9  | F2      | P00734 |
| Alkaloids 9 | MKNK2   | Q9HBH9 | Others 9  | PRSS1   | P07477 |
| Others 10   | PTGS2   | P35354 | Others 11 | AR      | P10275 |
| Others 10   | FNTA    | P49354 | Others 11 | NR3C1   | P04150 |
| Others 10   | CYP19A1 | P11511 | Others 11 | CYP19A1 | P11511 |
| Others 10   | PTPN1   | P18031 | Others 11 | PGR     | P06401 |
| Others 10   | F2      | P00734 | Others 11 | HSD11B1 | P28845 |
| Others 10   | PRSS1   | P07477 | Others 11 | NR3C2   | P08235 |
| Others 10   | HSD11B1 | P28845 | Others 11 | PTGS2   | P35354 |
| Others 10   | NOS2    | P35228 | Others 11 | F2      | P00734 |
| Others 10   | TERT    | O14746 | Others 11 | HMGCR   | P04035 |
| Others 10   | AR      | P10275 | Others 11 | CYP17A1 | P05093 |
| Others 10   | ACHE    | P22303 | Others 11 | HSD17B2 | P37059 |
| Others 10   | PGR     | P06401 | Others 11 | MTNR1A  | P48039 |
| Others 10   | CTRC    | Q99895 | Others 11 | MTNR1B  | P49286 |
| Others 10   | GSK3B   | P49841 | Others 11 | PTPN1   | P18031 |
| Others 10   | PARP1   | P09874 | Others 11 | FNTA    | P49354 |
| Others 12   | CYP19A1 | P11511 | Others 13 | HSD11B1 | P28845 |
| Others 12   | HMGCR   | P04035 | Others 13 | SAE1    | Q9UBE0 |
| Others 12   | PGR     | P06401 | Others 13 | AKR1B10 | O60218 |
| Others 12   | AR      | P10275 | Others 13 | PTGS2   | P35354 |
| Others 12   | CYP17A1 | P05093 | Others 13 | PTPN1   | P18031 |
| Others 12   | HSD17B2 | P37059 | Others 13 | POLA1   | P09884 |
| Others 12   | PTGES   | O14684 | Others 13 | POLB    | P06746 |
| Others 12   | FNTA    | P49354 | Others 13 | TOP2A   | P11388 |
| Others 12   | CTRC    | Q99895 | Others 13 | CDC25C  | P30307 |
| Others 12   | NR3C2   | P08235 | Others 13 | IMPDH1  | P20839 |
| Others 12   | GSK3B   | P49841 | Others 13 | PTGES   | O14684 |
| Others 12   | PTGS2   | P35354 | Others 13 | PTGS1   | P23219 |
| Others 12   | HSD11B1 | P28845 | Others 13 | AMPD2   | Q01433 |

|           |       |        |           |        |        |
|-----------|-------|--------|-----------|--------|--------|
| Others 12 | PTPN2 | P17706 | Others 13 | NR1H4  | Q96R11 |
| Others 12 | DRD2  | P14416 | Others 13 | UGT2B7 | P16662 |

**Table S5.** The targets of potential active ingredients from HIT database.

| Compound            | Target  | Swiss-Prot ID | Compound    | Target  | Swiss-Prot ID |
|---------------------|---------|---------------|-------------|---------|---------------|
| Phenylpropanoids 3  | TYR     | P14679        | Flavonoid 4 | IL4     | P05112        |
| Phenylpropanoids 3  | Co-1    | Q9ZP19        | Flavonoid 4 | ALG5    | Q9Y673        |
| Phenylpropanoids 3  | NOS3    | P29474        | Flavonoid 4 | CD40LG  | P29965        |
| Phenylpropanoids 3  | CCL16   | O15467        | Flavonoid 4 | RELA    | Q04206        |
| Phenylpropanoids 4  | MGAM    | O43451        | Flavonoid 4 | CFLAR   | O15519        |
| Phenylpropanoids 4  | CYP73A5 | P92994        | Flavonoid 4 | BCL2L1  | Q07817        |
| Phenylpropanoids 8  | PTGS1   | P23219        | Flavonoid 4 | MCL1    | Q07820        |
| Phenylpropanoids 8  | PTGS2   | P35354        | Flavonoid 4 | XIAP    | P98170        |
| Phenylpropanoids 8  | SELP    | P16109        | Flavonoid 4 | ALPI    | P09923        |
| Phenylpropanoids 8  | ACHE    | P22303        | Flavonoid 4 | PTGS2   | P35354        |
| Phenylpropanoids 8  | GFAP    | P14136        | Flavonoid 4 | NFKBIA  | P25963        |
| Phenylpropanoids 8  | IGF2    | P01344        | Flavonoid 4 | AKT1    | P31749        |
| Phenylpropanoids 8  | RAC1    | P63000        | Flavonoid 4 | BAD     | Q92934        |
| Phenylpropanoids 8  | CYP1A1  | P04798        | Flavonoid 4 | IGF1R   | P08069        |
| Phenylpropanoids 8  | TNF     | P01375        | Flavonoid 4 | CASP9   | P55211        |
| Phenylpropanoids 8  | BTK     | Q06187        | Flavonoid 4 | CYP19A1 | P11511        |
| Phenylpropanoids 8  | PRKCB   | P05771        | Flavonoid 4 | HIF1A   | Q16665        |
| Phenylpropanoids 44 | CDK2    | P24941        | Flavonoid 4 | GSK3B   | P49841        |
| Phenylpropanoids 44 | CDK4    | P11802        | Flavonoid 4 | VEGFA   | P15692        |
| Phenylpropanoids 44 | RB1     | P06400        | Flavonoid 4 | CCND1   | P24385        |
| Phenylpropanoids 44 | CDKN1A  | P38936        | Flavonoid 4 | EIF6    | P56537        |
| Phenylpropanoids 44 | HERC5   | Q9UII4        | Flavonoid 4 | NOS2    | P35228        |
| Phenylpropanoids 44 | E2F1    | Q01094        | Flavonoid 4 | TP53    | P04637        |
| Phenylpropanoids 44 | MMP1    | P03956        | Flavonoid 4 | CDKN2A  | P42771        |
| Phenylpropanoids 44 | BCL2    | P10415        | Flavonoid 4 | RUNX1T1 | Q06455        |
| Phenylpropanoids 44 | CASP3   | P42574        | Flavonoid 4 | HERC5   | Q9UII4        |
| Phenylpropanoids 44 | MMP3    | P08254        | Flavonoid 4 | CDK1    | P06493        |
| Anthraquinones 18   | CCNA2   | P20248        | Flavonoid 4 | CCNA2   | P20248        |
| Anthraquinones 18   | CDK2    | P24941        | Flavonoid 4 | CCNB1   | P14635        |
| Anthraquinones 18   | PCNA    | P12004        | Flavonoid 4 | CDKN1A  | P38936        |
| Anthraquinones 18   | PRKCA   | P17252        | Flavonoid 4 | BAX     | Q07812        |
| Anthraquinones 18   | MYC     | P01106        | Flavonoid 4 | CYCS    | P99999        |
| Anthraquinones 18   | CCNB1   | P14635        | Flavonoid 4 | AHSA1   | O95433        |
| Anthraquinones 18   | CDK1    | P06493        | Flavonoid 4 | MDM2    | Q00987        |
| Anthraquinones 18   | IL1B    | P01584        | Flavonoid 4 | BCL2    | P10415        |
| Anthraquinones 18   | TNF     | P01375        | Flavonoid 4 | PSME3   | P61289        |
| Anthraquinones 18   | CASP3   | P42574        | Flavonoid 4 | G6PC    | P35575        |
| Anthraquinones 18   | TP53    | P04637        | Flavonoid 4 | INS     | P01308        |
| Anthraquinones 18   | CDKN1A  | P38936        | Flavonoid 4 | APC     | P25054        |

|                   |         |        |             |          |        |
|-------------------|---------|--------|-------------|----------|--------|
| Anthraquinones 18 | FASN    | P49327 | Flavonoid 4 | HMOX1    | P09601 |
| Anthraquinones 18 | BAX     | Q07812 | Flavonoid 4 | ICAM1    | P05362 |
| Anthraquinones 18 | PRKCD   | Q05655 | Flavonoid 4 | MS4A2    | Q01362 |
| Anthraquinones 18 | PRKCE   | Q02156 | Flavonoid 4 | FCER2    | P06734 |
| Phenolic acids 5  | TYRP1   | P17643 | Flavonoid 4 | IL13     | P35225 |
| Phenolic acids 5  | NOS3    | P29474 | Flavonoid 4 | RB1      | P06400 |
| Phenolic acids 8  | ODC1    | P11926 | Flavonoid 4 | TRPM2    | O94759 |
| Phenolic acids 9  | JUN     | P05412 | Flavonoid 4 | ESR1     | P03372 |
| Phenolic acids 9  | MAPK1   | P28482 | Flavonoid 4 | ACACA    | Q13085 |
| Phenolic acids 9  | MMP9    | P14780 | Flavonoid 4 | AKR1C3   | P42330 |
| Phenolic acids 15 | COMT    | P21964 | Flavonoid 4 | CCND2    | P30279 |
| Phenolic acids 15 | MYB     | P10242 | Flavonoid 4 | CDK2     | P24941 |
| Flavonoid 5       | IL4     | P05112 | Flavonoid 4 | CDK4     | P11802 |
| Flavonoid 5       | IL13    | P35225 | Flavonoid 4 | CDK6     | Q00534 |
| Flavonoid 5       | PTGS2   | P35354 | Flavonoid 4 | EEF1E1   | O43324 |
| Flavonoid 5       | CYP19A1 | P11511 | Flavonoid 4 | ODC1     | P11926 |
| Flavonoid 5       | TGFB1   | P01137 | Flavonoid 4 | PSMD3    | O43242 |
| Flavonoid 5       | CDKN1A  | P38936 | Flavonoid 4 | CASP3    | P42574 |
| Flavonoid 5       | MS4A2   | Q01362 | Flavonoid 4 | SLC5A5   | Q92911 |
| Alkaloids 1       | TNF     | P01375 | Flavonoid 4 | PLAU     | P00749 |
| Alkaloids 1       | IL1B    | P01584 | Flavonoid 4 | SERPINE1 | P05121 |
| Alkaloids 1       | IL6     | P05231 | Flavonoid 4 | MMP9     | P14780 |
| Alkaloids 1       | PTGS2   | P35354 | Flavonoid 4 | FXYD2    | P54710 |
| Alkaloids 1       | NOS2    | P35228 | Flavonoid 4 | AAGAB    | Q6PD74 |
| Flavonoid 4       | MMP1    | P03956 | Flavonoid 4 | IKBK6    | Q9Y6K9 |
| Flavonoid 4       | AR      | P10275 | Flavonoid 4 | JUN      | P05412 |
| Flavonoid 4       | IFNG    | P01579 | Flavonoid 4 | FOS      | P01100 |
| Flavonoid 4       | IL2     | P60568 | Flavonoid 4 | TNF      | P01375 |
| Flavonoid 4       | INSR    | P06213 |             |          |        |

**Table S6.** The genes from Drugbank, TTD, IPA databases.

| Gene    | Uniprot ID | Gene   | Uniprot ID | Gene    | Uniprot ID | Gene   | Uniprot ID |
|---------|------------|--------|------------|---------|------------|--------|------------|
| HPGDS   | O60760     | CHRM2  | P08172     | FCER1G  | P30273     | TLR7   | Q9NYK1     |
| CYP1A2  | P05177     | IL3    | P08700     | FCER1A  | P12319     | TNF    | P01375     |
| HRH1    | P35367     | CYP2D6 | P10635     | CHRM5   | P08912     | PDE4B  | Q07343     |
| SLC18A2 | Q05940     | CHRM1  | P11229     | ADORA2A | P29274     | HRH3   | Q9Y5N1     |
| TAAR1   | Q96RJO     | CHRM3  | P20309     | ADRA2C  | P18825     | HRH4   | Q9H3N8     |
| NTSR2   | O95665     | SLC6A2 | P23975     | ALOX5   | P09917     | ITGA5  | P08648     |
| HTR2A   | P28223     | SLC6A3 | Q01959     | BDKRB2  | P30411     | IL13   | P35225     |
| HTR2C   | P28335     | ADRA1A | P35348     | PDE4A   | P27815     | PTGDR  | Q13258     |
| NR3C1   | P04150     | ADRA2A | P08913     | CYSLTR1 | Q9Y271     | PTGDR2 | Q9Y5Y4     |
| KCNMA1  | Q12791     | SLC6A4 | P31645     | PLA2G1B | P04054     | ESRRA  | P11474     |
| TLR8    | Q9NR97     | ADRB1  | P08588     | HTR2B   | P41595     | PDE3A  | Q14432     |
| TLR9    | Q9NR96     | ADRB2  | P07550     | IL10    | P22301     | PDE3B  | Q13370     |

|         |        |         |        |        |        |       |        |
|---------|--------|---------|--------|--------|--------|-------|--------|
| PDE4D   | Q08499 | ADRB3   | P13945 | LEP    | P41159 | PDE4C | Q08493 |
| CCR3    | P51677 | ANXA1   | P04083 | LGALS9 | O00182 | PDE5A | O76074 |
| ADORA1  | P30542 | CHRM4   | P08173 | MC2R   | Q01718 | PDE7A | Q13946 |
| ADORA2B | P29275 | CYSLTR2 | Q9NS75 | MS4A2  | Q01362 | PDE7B | Q9NP56 |
| ADORA3  | P0DMS8 | FLG     | P20930 | OPRD1  | P41143 | PDE8A | O60658 |
| ADRA1B  | P35368 | HAVCR2  | Q8TDQ0 | OPRK1  | P41145 | PDE8B | O95263 |
| ADRA1D  | P25100 | HDAC2   | Q92769 | OPRM1  | P35372 | PGR   | P06401 |
| ADRA2B  | P18089 | HRH2    | P25021 | PDE11A | Q9HCR9 | PTGDS | P41222 |
| PTGS1   | P23219 | PTGS2   | P35354 | TRPV1  | Q8NER1 |       |        |

**Table S7.** Up-regulated genes.

| Gene     | Uniprot ID | Gene    | Uniprot ID | Gene     | Uniprot ID | Gene    | Uniprot ID |
|----------|------------|---------|------------|----------|------------|---------|------------|
| ADAM19   | Q9H013     | CENPF   | P49454     | IDO1     | P14902     | NDFIP2  | Q9NV92     |
| AIM2     | O14862     | CEP55   | Q53EZ4     | IFNG     | P01579     | NKG7    | Q16617     |
| APOBEC3G | Q9HC16     | CHEK1   | O14757     | IL18R1   | Q13478     | NUSAP1  | Q9BXS6     |
| ASF1B    | Q9NVP2     | CKS2    | P33552     | IL2RA    | P01589     | OIP5    | O43482     |
| ASPM     | Q8IZT6     | CST7    | O76096     | IL2RB    | P14784     | PCNA    | P12004     |
| AURKA    | O14965     | CTLA4   | P16410     | IL32     | P24001     | PDCD1   | Q15116     |
| AURKB    | Q96GD4     | CXCR3   | P49682     | IRF4     | Q15306     | PKMYT1  | Q99640     |
| BATF     | Q16520     | CXCR6   | O00574     | ITPKA    | P23677     | PLA2G16 | P53816     |
| BHLHE40  | O14503     | DEPDC1B | Q8WUY9     | KIAA0101 | Q15004     | PLK4    | O00444     |
| BIRC5    | O15392     | DTL     | Q9NZJ0     | KIAA1324 | Q6UXG2     | PMAIP1  | Q13794     |
| BLM      | P54132     | DUSP5   | Q16690     | KIF14    | Q15058     | PMCH    | P20382     |
| BUB1     | O43683     | E2F2    | Q14209     | KIF15    | Q9NS87     | POLE2   | P56282     |
| C17orf53 | Q8N3J3     | EBI3    | Q14213     | KIF20A   | O95235     | POLQ    | O75417     |
| CCDC50   | Q8IVM0     | ECT2    | Q9H8V3     | KIF23    | Q02241     | PRC1    | O43663     |
| CCL1     | P22362     | ELOVL6  | Q9HSJ4     | KIF2C    | Q99661     | PRDM1   | O75626     |
| CCL17    | Q92583     | EXO1    | Q9UQ84     | KIFC1    | Q9BW19     | PRF1    | P14222     |
| CCL3L1   | P16619     | EZH2    | Q15910     | LAG3     | P18627     | PTTG1   | O95997     |
| CCNA2    | P20248     | FEN1    | P39748     | LAMP3    | Q9UQV4     | RACGAP1 | Q9H0H5     |
| CCNB1    | P14635     | FOXM1   | Q08050     | LAPTM4B  | Q86VI4     | RANBP1  | P43487     |
| CCNB2    | O95067     | GBP1    | P32455     | LMCD1    | Q9NZU5     | RBBP8   | Q99708     |
| CCNF     | P41002     | GBP4    | Q96PP9     | LMNB1    | P20700     | RDH10   | Q8IZV5     |
| CD38     | P28907     | GBP5    | Q96PP8     | MAD2L1   | Q13257     | RGS1    | Q08116     |
| CDC20    | Q12834     | GF11    | Q99684     | MAP1LC3A | Q9H492     | SGPP2   | Q8IWX5     |
| CDC25A   | P30304     | GLDC    | P23378     | MCM10    | Q7L590     | SH2D2A  | Q9NP31     |
| CDCA3    | Q99618     | GMNN    | O75496     | MCM2     | P49736     | SLC27A2 | O14975     |
| CDCA5    | Q96FF9     | GNG4    | P50150     | MCM4     | P33991     | SLC35F2 | Q8IXU6     |
| CDCA7    | Q9BWT1     | GNLY    | P22749     | MCM5     | P33992     | SNX5    | Q9Y5X3     |
| CDCA8    | Q53HL2     | GZMA    | P12544     | MELK     | Q14680     | SOCS1   | O15524     |
| CDK6     | Q00534     | GZMB    | P10144     | MND1     | Q9BWT6     | SOCS2   | O14508     |
| CDKN3    | Q16667     | H2AFX   | P16104     | MTHFD1L  | Q6UB35     | SP140   | Q13342     |
| CDT1     | Q9H211     | HBG1    | P69891     | MYB      | P10242     | STAT1   | P42224     |
| CENPA    | P49450     | HELLS   | Q9NRZ9     | MYO1G    | B011T2     | STMN1   | P16949     |

|          |        |        |        |       |        |        |        |
|----------|--------|--------|--------|-------|--------|--------|--------|
| CENPE    | Q02224 | ICOS   | Q9Y6W8 | NCALD | P61601 | TK1    | P04183 |
| TMEM173  | Q86WV6 | TOP2A  | P11388 | TYMS  | P04818 | ZBED2  | Q9BTP6 |
| TMEM97   | Q5BJF2 | TRIP13 | Q15645 | UBD   | O15205 | ZBTB32 | Q9Y2Y4 |
| TNFRSF18 | Q9Y5U5 | TROAP  | Q12815 | UBE2S | Q16763 | ZWINT  | O95229 |
| TNFRSF4  | P43489 | TSPAN5 | P62079 | UBE2T | Q9NPD8 |        |        |
| TNFSF4   | P23510 | TTK    | P33981 | UHRF1 | Q96T88 |        |        |

**Table S8.** Down-regulated genes.

| Gene     | Uniprot ID | Gene    | Uniprot ID | Gene    | Uniprot ID | Gene    | Uniprot ID |
|----------|------------|---------|------------|---------|------------|---------|------------|
| ABCA1    | O95477     | CSF1R   | P07333     | HNMT    | P50135     | PSAP    | P07602     |
| ADAMDEC1 | O15204     | CST3    | P01034     | IFI30   | P13284     | RAB32   | Q13637     |
| AIF1     | P55008     | EPB41L3 | Q9Y2J2     | LDLRAP1 | Q55W96     | RAB7B   | Q96AH8     |
| ALDH1A1  | P00352     | FAM46A  | Q96IP4     | LILRA5  | A6NI73     | RNASE1  | P07998     |
| ALDH2    | P05091     | FCGRT   | P55899     | LILRB2  | Q8N423     | S100A9  | P06702     |
| ALOX5    | P09917     | FCN1    | O00602     | MAFB    | Q9Y5Q3     | SLCO2B1 | O94956     |
| APOC1    | P02654     | FPR1    | P21462     | MERTK   | Q12866     | SNCA    | P37840     |
| APOE     | P02649     | FUCA1   | P04066     | MMP9    | P14780     | TGFBI   | Q15582     |
| C1orf162 | Q8NEQ5     | GAS7    | O60861     | MS4A6A  | Q9H2W1     | TMEM51  | Q9NW97     |
| CD14     | P08571     | GPR162  | Q16538     | MS4A7   | Q9GZW8     | TPM2    | P07951     |
| CDH23    | Q9H251     | GRN     | P28799     | NLRP3   | Q96P20     | VIPR1   | P32241     |
| CFD      | P00746     | GSN     | P06396     | NPC2    | P61916     | VSIG4   | Q9Y279     |
| CPVL     | Q9H3G5     | HAMP    | P81172     | NPL     | Q9BXD5     |         |            |

**Table S9.** Top 10 KEGG pathway.

| Term                                    | Count | P-value  | Genes                                                                                                                                                                                                                       |
|-----------------------------------------|-------|----------|-----------------------------------------------------------------------------------------------------------------------------------------------------------------------------------------------------------------------------|
| Neuroactive ligand-receptor interaction | 31    | 6.52E-19 | OPRM1, ADORA3, ADORA2B, TRPV1, ADORA2A, DRD2, NR3C1, BDKRB2, ADORA1, HTR1A, HRH3, CNR1, CNR2, HRH4, ADRA2A, ADRA2C, LEP, ADRB2, CHRMS, CHRM4, CHRM3, CHRM2, HTR7, CHRM1, ADRA1B, ADRA1A, HTR2B, HTR2C, ADRA1D, HTR2A, OPRD1 |
| Fc epsilon RI signaling pathway         | 13    | 1.69E-10 | FCER1A, IL4, PIK3CG, IL3, TNF, IL13, BTK, AKT1, MAPK1, FYN, MS4A2, FCER1G, SYK                                                                                                                                              |
| cGMP-PKG signaling pathway              | 16    | 6.30E-09 | ADORA3, PDE3B, BDKRB2, ADORA1, AKT1, MAPK1, ADRB2, INS, PDE5A, ADRA2A, ADRA1B, ADRA1A, NOS3, ADRA2C, ADRA1D, OPRD1                                                                                                          |
| Chagas disease                          | 13    | 2.61E-08 | PIK3CG, IRAK4, AKT1, MAPK1, IL6, TNF, JUN, IKBKG, IL1B, BDKRB2, IL10, TLR9, IL2                                                                                                                                             |

|                                         |    |          |                                                                                                                      |
|-----------------------------------------|----|----------|----------------------------------------------------------------------------------------------------------------------|
| Calcium signaling pathway               | 16 | 3.47E-08 | ADRB2, CHRM5, CHRM3, ADORA2B, ADORA2A, CHRM2, HTR7, CHRM1, ADRA1B, ADRA1A, NOS3, BDKRB2, HTR2B, HTR2C, ADRA1D, HTR2A |
| Progesterone-mediated oocyte maturation | 12 | 3.94E-08 | PIK3CG, CCNB1, PGR, AKT1, CDK1, MAPK1, CCNB2, INS, BUB1, PDE3B, CCNA2, CDK2                                          |
| Measles                                 | 14 | 4.97E-08 | IL4, PIK3CG, IL6, IL13, CDK6, CDK4, TLR7, CDK2, TLR9, AKT1, IRAK4, FYN, IL1B, IL2                                    |
| Serotonergic synapse                    | 13 | 5.47E-08 | MAPK1, HTR1A, PTGS2, HTR7, MAOA, CYP2D6, SLC6A4, PTGS1, MAOB, ALOX5, HTR2B, HTR2C, HTR2A                             |
| Sphingolipid signaling pathway          | 13 | 1.31E-07 | FCER1A, PIK3CG, TNF, ADORA3, BDKRB2, ADORA1, AKT1, MAPK1, FYN, MS4A2, FCER1G, NOS3, OPRD1                            |
| Hepatitis B                             | 14 | 1.39E-07 | PIK3CG, IL6, TNF, CYCS, BIRC5, CDK6, CDK4, CDK2, AKT1, MAPK1, CDKN1A, JUN, IKBKG, CCNA2                              |

**Table S10.** Top 10 molecular function.

| <b>Term</b>                                               | <b>Count</b> | <b>P-value</b> | <b>Genes</b>                                                                            |
|-----------------------------------------------------------|--------------|----------------|-----------------------------------------------------------------------------------------|
| drug binding                                              | 13           | 9.66E-14       | DRD2, SLC6A3, CYP2D6, TLR7, TLR8, CHRM3, CHRM2, CHRM1, CNR1, HTR2B, TOP2A, HTR2C, HTR2A |
| G-protein coupled acetylcholine receptor activity         | 7            | 5.48E-13       | CHRM5, CHRM4, HRH3, CHRM3, CHRM2, CHRM1, HRH4                                           |
| G-protein coupled adenosine receptor activity             | 5            | 9.47E-09       | P2RY12, ADORA3, ADORA2B, ADORA2A, ADORA1                                                |
| cyclin-dependent protein serine/threonine kinase activity | 6            | 2.93E-06       | CCNB1, CDK1, CCNB2, CDK6, CDK4, CDK2                                                    |
| cyclin binding                                            | 5            | 8.49E-06       | CDK1, CDKN1A, CDK6, CDK4, CDK2                                                          |



|                                               |    |          |                                                                                |
|-----------------------------------------------|----|----------|--------------------------------------------------------------------------------|
| enzyme binding                                | 12 | 1.45E-05 | PGR, AKT1, CYP1A1, PTGS2, ADORA2A, FYN, JUN, ESR1, BIRC5, PTPN1, CYP1A2, TOP2A |
| neurotransmitter receptor activity            | 5  | 2.54E-05 | HTR1A, HTR7, HTR2B, HTR2C, HTR2A                                               |
| protein kinase activity                       | 12 | 2.90E-05 | PIK3CG, IRAK4, AKT1, CDK1, BUB1, AURKA, GRK2, CDK4, GRK3, CDK2, SYK, BTK       |
| serotonin binding                             | 4  | 3.39E-05 | HTR1A, HTR2B, HTR2C, HTR2A                                                     |
| G-protein coupled serotonin receptor activity | 5  | 3.44E-05 | HTR1A, HTR7, HTR2B, HTR2C, HTR2A                                               |

**Table S11.** Top 10 cellular component.

| Term                                  | Count | P-value  | Genes                                                                                                                                                                                                                                                                                                                                                                                       |
|---------------------------------------|-------|----------|---------------------------------------------------------------------------------------------------------------------------------------------------------------------------------------------------------------------------------------------------------------------------------------------------------------------------------------------------------------------------------------------|
| integral component of plasma membrane | 38    | 1.41E-14 | OPRM1, TNF, ADORA2B, TRPV1, DRD2, SLC6A2, ADORA2A, SLC6A3, SLC6A4, BDKRB2, ADORA1, TLR7, HTR1A, HRH3, CNR1, CNR2, ADRA2A, FCER1G, MS4A2, ADRA2C, FCER1A, FLT4, P2RY12, CHRM5, ADRB2, CHRM4, CHRM3, CHRM2, HTR7, CHRM1, ADRA1B, ADRA1A, HTR2B, HTR2C, PTGDR2, ADRA1D, OPRD1, HTR2A                                                                                                           |
| plasma membrane                       | 55    | 3.28E-09 | OPRM1, ADORA3, TRPV1, SLC6A2, SLC6A3, SLC6A4, ADORA1, TLR7, BTK, TLR9, AKT1, HTR1A, MS4A2, NOS3, SYK, PIK3CG, ESR1, CHRM5, ADRB2, CHRM4, CHRM3, CHRM2, HTR7, CHRM1, PTGDR2, TNF, ADORA2B, DRD2, ADORA2A, COMT, BDKRB2, IRAK4, HRH3, CNR1, HRH4, CNR2, ADRA2A, FCER1G, ADRA2C, FCER1A, FLT4, P2RY12, FYN, ITGA5, ADRA1B, ADRA1A, GRK5, PTPN1, GRK2, HTR2B, GRK3, HTR2C, ADRA1D, HTR2A, OPRD1 |
| asymmetric synapse                    | 5     | 9.62E-08 | CHRM3, ADORA2A, CHRM2, CHRM1, ADORA1                                                                                                                                                                                                                                                                                                                                                        |

|                                  |    |          |                                                                                                                                                                                                                                                                                 |
|----------------------------------|----|----------|---------------------------------------------------------------------------------------------------------------------------------------------------------------------------------------------------------------------------------------------------------------------------------|
| spindle                          | 9  | 8.56E-07 | KIF23, AKT1, KIF11, NUSAP1, TTK, BIRC5, AURKA, NR3C1, KIF20A                                                                                                                                                                                                                    |
| midbody                          | 9  | 1.39E-06 | KIF23, CDK1, CDCA8, CENPE, BIRC5, AURKA, CEP55, ASPM, KIF20A                                                                                                                                                                                                                    |
| postsynaptic membrane            | 10 | 6.65E-06 | CHRM5, CHRM4, CHRM3, ADORA2A, TRPV1, CHRM2, CHRM1, COMT, ADORA1, OPRD1                                                                                                                                                                                                          |
| external side of plasma membrane | 10 | 7.18E-06 | IL4, FCER1A, P2RY12, IL6, TNF, TRPV1, ITGA5, FCER1G, MS4A2, IL13                                                                                                                                                                                                                |
| dendrite                         | 12 | 7.53E-06 | HTR1A, CHRM3, ADORA2A, DRD2, TRPV1, CHRM2, HTR7, CHRM1, CNR2, HTR2B, HTR2C, HTR2A                                                                                                                                                                                               |
| cytosol                          | 41 | 9.94E-06 | KIF23, TRPV1, SLC6A4, PDE3B, AURKA, COMT, BTK, IRAK4, AKT1, AKR1C3, KIF2C, CDCA8, ALOX5AP, PDE4B, BUB1, IL1B, NOS3, HPGDS, SYK, PIK3CG, CDK1, KIF11, NAT1, CYCS, CENPE, BIRC5, CDK6, CDK4, CDK2, CCNB1, MAPK1, CDKN1A, CCNB2, FYN, JUN, IKBKG, PDE5A, ALOX5, PTPN1, GRK2, HTR2A |
| axon terminus                    | 6  | 1.16E-05 | CHRM3, DRD2, CHRM2, CHRM1, ADRA2C, OPRD1                                                                                                                                                                                                                                        |

**Table S12.** Top 10 molecular function.

| Term                                                                                    | Count | P-value  | Genes                                                                                                                                              |
|-----------------------------------------------------------------------------------------|-------|----------|----------------------------------------------------------------------------------------------------------------------------------------------------|
| adenylate cyclase-inhibiting G-protein coupled acetylcholine receptor signaling pathway | 22    | 1.06E-15 | IL4, CDK1, IL6, PTGS2, CYP1A1, ADORA2A, SLC6A2, DRD2, SLC6A3, SLC6A4, MAOB, COMT, CDK4, IL10, CCNB1, CDKN1A, FYN, JUN, ADRA1A, HTR2B, HTR2C, HTR2A |
| inflammatory response                                                                   | 7     | 5.65E-13 | CHRM5, CHRM4, HRH3, CHRM3, CHRM2, CHRM1, HRH4                                                                                                      |
| phospholipase C-activating G-protein coupled acetylcholine receptor signaling pathway   | 21    | 8.34E-13 | PIK3CG, IL6, TNF, PTGS2, ADORA2A, PTGS1, IL13, BDKRB2, CCL16, TLR7, ADORA1, IL10, TLR8, TLR9, AKT1, CNR2, IKBKG, HRH4, IL1B, MS4A2, SYK            |

|                                                                    |    |          |                                                                                                                        |
|--------------------------------------------------------------------|----|----------|------------------------------------------------------------------------------------------------------------------------|
| positive regulation of nitric oxide biosynthetic process           | 7  | 2.25E-12 | CHRM5, CHRM4, HRH3, CHRM3, CHRM2, CHRM1, HRH4                                                                          |
| cell-cell signaling                                                | 9  | 3.90E-10 | OPRM1, AKT1, IL6, TNF, PTGS2, TRPV1, INS, ESR1, IL1B                                                                   |
| positive regulation of cell proliferation                          | 15 | 1.66E-09 | IL3, ADORA2A, IL13, CCL16, ADORA1, IL10, PGR, ADRB2, INS, ADRA1B, ADRA1A, IL1B, ADRA2C, ADRA1D, IL2                    |
| adenylate cyclase-activating adrenergic receptor signaling pathway | 19 | 2.04E-09 | IL3, IL6, FLT4, TTK, BIRC5, CDK4, CDK2, LEP, AKR1C3, MAPK1, HTR1A, INS, CHRM1, ADRA2A, GRK5, HTR2B, ADRA1D, IL2, HTR2A |
| cyclooxygenase pathway                                             | 7  | 2.05E-09 | ADRB2, DRD2, ADRA2A, ADRA1B, ADRA1A, ADRA2C, ADRA1D                                                                    |
| synaptic transmission, cholinergic                                 | 6  | 3.10E-09 | AKR1C3, PTGDS, PTGS2, PTGES, PTGS1, HPGDS                                                                              |
| positive regulation of mast cell degranulation                     | 8  | 4.51E-09 | CHRM5, CHRM4, HRH3, CHRM3, ADORA2A, CHRM2, CHRM1, HRH4                                                                 |

---
